# Supplementary material for: Genome-wide analysis of the laccase (LAC) gene family in Aeluropus littoralis: A focus on identification, evolution and expression patterns in response to abiotic stresses and ABA treatment
Source: Front Plant Sci. 2023 Mar 1;14:1112354. doi: 10.3389/fpls.2023.1112354 (PMC10014554; doi:10.3389/fpls.2023.1112354)
Supplement: Supplementary Table 2 — Accession number and sequences (gene, protein, and CDS) of AlLAC genes. [file Table_2.xlsx]

## Sheet: Gene sequence 
AlLAC gene sequence
Gene ID	Accession number	Protein sequence
LAC11.1	Al_clc_g8981	ATGGCGGGAAGATACAGCAATGGAGCTCTGGTTCTTCTTACGTGCATCTGCCTGTTCATCGCCTCCGCGAAGGCGGAAGCTCCGTACAGATTCTTCGACTGGGAGGTCACCTACGGCGAAATCAGTCCCCTGGGATTTCCGCAACAGGTGCAAAGCTTCTCGCGGTTTAATATTCTGCATAAACAAGACGCGTGCGCTGTCTGCCGTTTCTATTTCGTTTACAGATCGCTTGACATGAGTTGCGTGTTTGCGTTTCTCCAGGGAATTTTGATCAACGGGCAGTTTCCGGGGCCAGAAATCGAGTGCCAGACGAACGACAATTTGATCATCAACGTGCGCAATAGCTTACCGGAGCCATTCTTGCTGTCATGGTACGATCAGCTCTCCACATTGTTCCAC…
LAC12.1	Al_clc_g9248	ATGGCTTCGTCCTCGTCGTCCCGGCTGCTCTTCCTCCTCTCGTGCCTCGCGCTTGCCTTGCTCGCCAACGCCCAAGAAGTGCACCAACATGAGTTCGTGGTACGTGATCTTATCCGCCAGGTTTTATTTCAGTGTGCATCTCCGAACAGCTTTTGCTGATGTATTGATTTGACTCCTGCTAGGTCCAAGAGACGCCGGTGAAGAGGCTGTGCAACGAGCACCACATTATCACGGTGAACGGGCAGTTCCCGGGGCCGACGCTGGAGGTCAGGGAGGGCGACACCCTCGAGATCAACGTCATCAACCGGGCGCAGTACGACGTCACCATCCACTGGCATGGTGTCCGGCAGCTGGGAACGCCGTGGGCGGACGGGCCGGAGTTCGTGACGCAGTGTCCCA…
LAC11.2	Al_clc_g10563	ATGGGGACGCCGCAGAAGGTGATCCTCATCAACGACATGTTCCCGGGCCCAACCATCAACTGCACCTCCAACAACAACATCGTCATCAATGTCTTCAACATGCTCGACGAGCCGCTCCTCTTCACCTGGTAAGCTGTTTTATCGATCGTGCCTGCGCGTAGAGATGAACGGGATTGTTGGAAATCGATTGATTCGATGACCATTGTGCGTATATGTTGCAGGCACGGAATCCAGCAGAGGAAGAACTCGTGGCAGGACGGCATGCCGGGCACCATGTGCCCCATCAAGCCAGGAACCAACTTCACGTACCACTGGCAGCCCAAGGACCAGATCGGCAGCTTCTTCTACTTCCCCAGCATCGGCATGCAGCGCTCGGCGGGCGGCTACGGCCTCATCAGC…
LAC6	Al_clc_g13795	ATGCCGCGGCTACTCGCGCTGGCGGCGGCGCTGCTGCTTGTTGGGCCGGCGCAGGCCGCCGACCCCTACGCCTTCTTCGACTGGGACGTCTCCTACGTCACCGCGGCGCCGCTCGGCGTCAGGCAACAGGCAAGCCGGCCATGGCGATCCTTTCTCTGTTGATCCTTTTTTCTTTCCAAGCTCAAGCTTGCGCGTCCTGACGAGCCGAGGGAACCGGCCACCGACAGGTGATTGGCATCAACGGCAAGTTCCCGGGCCCCGTCGTGAACATCACCACCAACTGGAACGTCGTCGTCAACGTGCTCAACGACCTCGATGAGCCGCTCCTCATCACCTGGTGCGTGCCCACCCATGCATCACGGAGCTAGCACCCGCTGCTGCTTGCACAAAATTCCTTGT…
LAC14	Al_clc_g4455	ATGGGTGCAGTTAGGGTTCCTGCAGTGCTTTGGCTGCTGCTAGGTGTGACGTTAACCTTTGGTGTTGCAGTTACCCCAGCCCAAGCATCCAGGGCTCATCACTACGATTTCTTTGTAAGTCGATCAATCTACTTGTATCTACGTATGCTATATTAGAGATCAATGCATCTGTTTGAGTATCTGCACCATCAAGAATAGTACTTGCTGAGCCTGGGCGCGCGCGCATCCTTGCTTGCAGTATTCGTTCAGCAAAAGAACACATGAATCTGCAGTACTGTATGCAGCAGGCAAAGAAGCAGACATTTGNNNNNNNNNNNNNNNTACTTGATTTCTTTTTCCGGACGGCACGTGAAAACCTGTACTATTAGTTTGCTAATTATATGTCCTACTGCTCTCCTT…
LAC7.2	Al_clc_g5179	ATGGCACTTCCGATTGCAGCAGCCCTGCTCTTATACGCTGTCCTGGCCCTCTCTGGAGCGGCAGGTAGCAAAGCGGCGGTCGTCAACCACACGTTTGTTGTGAGTATACAAATGCCTTCTATTGGGGAACCGAGATTTTTATTTTCAAAGTATCTAGGAATCGAAATATAGTTATTGAGTATTTTAATTTTTGCACTTCTATGCATATCATATTTTTCTTTTTTTTTCATTGTTTTGCCTTCTGTAAACTGGAGCAACTTACATATTTGTTTCAACACAGCATAAGGATATTCAAAACGAATGAATTAAGGAAAATTGCAGGTAAACTAAAGCATTTTGGGTAGGAAATTTTCTAAACCCGTTTAATGCACCACAAAATAAAATTTATCAAACAGGCAA…
LAC7.3	Al_clc_g5590	ATGGTGCAGCTTTTGCTGGTGTTTGCCCTTCTTCTTGTTGGACCAGTGGCAGATGCGGCGACGGCGAAATACACATTCACAGTACTCTCTCCCTCTCTCTCCATGCATTTGAGTTCTATTCGACCAGTTCGTTTGGTATAACCTAGAAGCTGGAGCCTTTCACAAGAAGATGAACTGGTTTCAGTTTGTTTCGTTTCTTTTTCCGGATAACAGTTTGTTGCGTTTCCACAACGAAACAAAGTTTCTAGTGCATGAAAGTACACTGGAAATCATCAATTCAGGATGAGATTGTGGCTTATGCGCCACAAAAGGGGAAAATTCTGAATTTGCTGGTTGTTAGGAGAGTCCAAGTTACATACATTTGGTTCATCCTCCAATCCATTGCCTTCGGCCCCTAGC…
LAC7.1	Al_clc_g5589	ATGCCTCGTTCTTGGCGGATCCTAGTGCTTTCTCTGTTTTGCACTGCAACTCTAGTGCACGCTGCTACTGTTGAGCATACGTTCAATGTAATCTTTGTTATCTCCCTCCCCGCTCGCGTGGTGTTCGTTCGATGTCTTAACTTGTATGGTATCCTCAAAATTTCAGGTTGGGACACTGTCTATACCGCGCATATGCCAGCCGGGGAACATAACCGTCACCGCCGTGAATGGACGAGTGCCCGGTCCCGTGATCCAAGCGACGGAAGGTGACACCGTGGTGATCCACGTCGTCAATGACTCTCCATACAACGTGACAATCCACTGGTACGCTAAGCACGAGCCTTACATACATACAACTGTTGCTATGAAAACGACCGCGATCAACCTCAACGTGCGGCA…
LAC17.2	Al_clc_g7023	ATGGCTAGCTCCTACTTCGTCCCCTGCTCTGTGCTCGTCGCTGTGCTCGTCCTGTTCTCCGTCAACGTGGCGGAGGCTGCCATCCAGGAGTACCAGTTCGATGTAAGTGGCTGCGACGCCACGACCTTGATTATTTTTCTTTTTTTTTAGTGCAAAGAGTCGAGAGTGCATTTATAATAGCGTAATGATCAACTTATTGACATGAAATGCAGGTGCAAATGACGAACGTGACGCGGCTGTGCAGCAGCAAGAGCATCGTGACGGTGAACGACCAGTTCCCTGGGCCGACGGTCTTCGCGCACGAGGGCGACCTCATCGTCGTCCGGGTCGTCAACCACGTCCCCTACAATATGAGCATCCACTGGTACAAGCATGAGCTTATTGGAGTTGTAGCTAGCT…
LAC17.1	Al_clc_g7022	ATGGCTGCCTCCTCTGCTCTTCCTTGCTCTCTCCTCATTGCAGCCATAGTGCTTCTCTCCGTCATCGTCCAAGCGCAAGGCATCACGAGGCGCTACGACTTCAACGTACGTCCTCTAGCTGGCGTACATTGTCCATTAAGCAGCTCGTAGCGCCATATGTATACTTGCTAAATGAGCTTGCTTGCAGGTGACCATGGCGAACGTGACACGCCTGTGCGCGAGCAAGAGCATCATCACGGTTAACGGGCAGTTTCCCGGCCCTCAGATCGTCGCGAGGGAAGGCGACCGCCTCGTCATTCGCGTGACCAACCACGTCCAGCACAACATCTCGCTGCACTGGTAAGTCAAAAACATAATGCGCGCGTTGGTGCAACCACTCTCGGCTTTGGTTTGCAGTGG…
LAC5	Al_clc_g12877	ATGGCAGCGATGGCGAGATCAAGTCTCGGCATGAAACTCCGCTCCTCCTCTGCTCTCCTTCTTGTGCTTCTCGGGTGCTTCCTGCTCCAGTCCGCCCTCGCGGAGGAGCGCTTCTACGAGTTCGTCGTAAGTGTCGTTGTTCATCTTGCAGTTATGGATGAACCGCTGTGTTATTCATCACGGTGGTTAACGATGCTGCGTGTGCAGGTGAAGGAGACGCCAGTGAAGAGGCTGTGCATGACCCACAACATCATCACGGTGAACGACCAGTTCCCGGGGCCAACGATCGAGGTGTACAACGGCGACACGCTGGCGATCAAGGCCATCAACCACGGCCGGTACAACGTGACCCTGCACTGGCACGGGGTCCGGCAGCTGCGGAACGGGTGGGCGGACGGG…
LAC16.2	Al_clc_g13079	ATGGCGACGATGCGCGCGGCGGCCGCCGGCGTGCTGCTAGTGCTGTCGGCGATGGCGGTGGTGCACGCCGAGGACCCGTACCTGTTCTTCGAGTGGAAGGTGACGTACGGGACCAAGTCCCTGCTGGGCGTGCCCCAGAAGGTCATCCTCATCAACGGCGAGTTCCCCGGGCCCAGGATCAACTGCTCCTCCAACAACAACATCGTCGTCAACGTCTTCAACCAGCTCGACCAGCCGCTCCTCTTCACCTGGTCCGTTGNNNNNNNNNNNNNNNNNNNNNNNNNNNNNNNNNNNNNNNNNNNNNATGCAGCACCGCAAGAACTCGTGGATGGACGGGATGCAGGGCACGCAGTGCCCGATCGCGCCGGGCACCAACTTCACGTACAAGTGGCAGCCCAA…
LAC16.1	Al_clc_g13683	ATGAATGGTGCCGGCATTGTGCTACAGGACCTTCCTAGCATGCCGCCAAGGGCATTTAACTACACCGACCCTGCATTGATTCCAGTCGTCCCTGGCGGGGAGCTGGAGAAGCTCGAGCCTTCACGGAAGGCGACGACAATGAGGCGATTTGCACATAACATCACAGTCGAAGTGGTTTTCCAGAGTACTGCAACAATGCAGAGCGACTCCAACCCAATGCATCTCCATGGACACGATTTCTTCGTGCTTGCTCAGGGTCTTGGTAACTACGACCCGGCGAAGCATGTGAGTAGCTACAACCTGGTGGACCCACTACTGAAGAACACCGTACAAGTGCCAAGGCTTGGATGGGCTGCCATTCGGTTTGTCGCCGACAACCCAGGGACCTGGTTCATGCAT…
LAC17.3	Al_clc_g15683	ATGAAGCCGCCCTACCTTGCATTGCTGGTGTTATTTGGCACTTTGCTGGTGTTGCCGCAGGCTTCGGTCGGCACGACGAGATACTACACCTTCAATGTATGTGCATTCTTCGATTTGTATGATGCATGCTTGCATCAATGCGCTTTCTGAACCTGTCCTTTCGTCTACGAAGTTTTCTATGTGAACGAGCAGGTTGTTAAAGAATGTGAGCTTGTTGTGTGTTTCATCAAATGTGAGCTTGCATTGGCAGGTTACAATGCAGAACGTGACGCGGCTAGGCACCACCCGTGCCATCCCGACGGTGAACGGCAAGTTCCCCGGCCCCAAAATAGTCACCAGGGATGGCGATCGCGTCGTTGTCAAGGTGGTTAACAATGTCAAGGACAACGTGACCATCCA…
LAC12.2	Al_clc_g1585	ATGATCGCACCCGGCCAGACCACCGACGTGCTCGTCACCTTCGACCAGCCGCCGGGCCGCTACTACCTCGCCGCGCGCGCCTACGCCAGCGCCCAGGGTGTCCCCTTCGACAACACCACCACCACCGCCATCTTCGATTACGGCAGCTCCACCAGCAGAAGCAAGCCTGTTGTCATGCCCACCCTGCCGGCGTACAATGACACCTCCACGGCCACCACATTCACGACGAGCCTGCGCGGCCTCCGCAAGGCGGAGCTTCCGTCAAAGGTCGATGAGAGCCTCTTCTTCACCGTTGGCGTGGGCCTCTTCAACTGCTCCGCTGGGCAGACCTGCGGAGGGCCCAACAACACGCGGTTCACGGCGAGCATCAACAATGTCTCCTTCGTGCTGCCGTCCACC…

## Sheet: Protein sequence
AlLAC protein sequence
Gene ID	Accession number	Protein sequence
LAC12.2	Al_clc_g1585	MIAPGQTTDVLVTFDQPPGRYYLAARAYASAQGVPFDNTTTTAIFDYGSSTSRSKPVVMPTLPAYNDTSTATTFTTSLRGLRKAELPSKVDESLFFTVGVGLFNCSAGQTCGGPNNTRFTASINNVSFVLPSTSSILQAHYHGTPTGVFTVDFPANPPVQFDYTAQNISRGLWQPVQGTKVYKLKYGSVVQLVLQGTNIFAAENHPIHIHGYDFYILAEGFGNFDAATDTAKFNLDDPPMRNTVAVPVNGWAVIRFVADNPGVWLMHCHLDVHITWGLAMAFLVEDGVGVLQSLEAPPPDLPLC
LAC14	Al_clc_g4455	MGAVRVPAVLWLLLGVTLTFGVAVTPAQASRAHHYDFFIKETNVTRLCHQKTVLTVNGQFPGPTIYARKGDVVVVNVYNQGDKNITIHWHGVDQPRNPWFDGPEYITQCPIQPGANFTYRIIFSEEEGTLWWHAHSDFDRATVHGAIVIHPKRGKGAYPYKKPHKEIPLLAGEWWNEDVNNLLEEAKRTGGDFEPSEANTINGQPGDLFPCSQNGTFRVPVEHGKTYLLRVINAGLTNEMFFGVAGHRLTVVGTDGRYLKPFTVDSIMISPGQTMNALLVADRATDGSCNSRYYMAARTFATNTQIKFNNSTATAILEYTDAPPSAGPPDMPTNLPAVDDIDAATAYTAQLRSLVTAEHPVDVPARVDEHMLVTIAINVVACPPDQTCEGPDNQRLAAS…
LAC7.2	Al_clc_g5179	MALPIAAALLLYAVLALSGAAGSKAAVVNHTFVIKQVYMQHLCNETLVTVVNGQFPGPPIEATEGDTVVVQVVNESPFGITIHWHGVKQRLTCWADGAEMITQCPIQPNTTFTYKFNVDGQEGTLWWHAHVSILRATLHGIIIIRPKSSSYPFQKPHMDVPIIIGEWWQRDLMKVDKNFSNGGSFSDNPAAATINGKLGDLNNCSGVPEDNFVLNVEHGKTYMLRLVNAVLFSEYYFKVAGHKFTVVGSDANYVKPYTTDVVAVAPGETFDVLMVADAPPCRYYMVALANQPPAPDPQIPVFTSRGVVQYKNIPSDADKKCRNEPLMPKMPDQHDTLTTFHFHGNLSGLPGHPLLPHIQGHVDEHLFISLGKGTICKGNKPSCKRGGSDESIEVAYMNN…
LAC7.1	Al_clc_g5589	MPRSWRILVLSLFCTATLVHAATVEHTFNVGTLSIPRICQPGNITVTAVNGRVPGPVIQATEGDTVVIHVVNDSPYNVTIHWHGVFQRRTPWADGPSMVTQCPIRPGGAYTYRFAVAGQEGTLWWHAHSSFMRATVHGALVIRPRRRAYPFPRPDGEKTVLLGEWWNADAVLLEREAFLSGTPIPTADVYAINGKPGDFYDCHATTSRISIFEVRRNSTYLLRIINAALNTQFFFKVAGHAFTVVAADASYTTPYATDVIVVAPGQTVDALMAADASPGCYYMAISSYQSAIPLRPGSFNGNITTAAVEYIEVAAPSYQQTPAPALPAMPEVTDTPTVNRFYTGLTALVRPGSKRTVPLAVDTRMFVTVGLGLSSCAPAQTSCNRSAPVVAASMNNASF…
LAC7.3	Al_clc_g5590	MVQLLLVFALLLVGPVADAATAKYTFTVASMQISQLCKTTDIIAVNGQLPGPAIEVNEGDAVVVNVINASPYNLTIHWHGVVQLLTPWADGPSMVTQCPIQPNSSYTYRFSVPGQEGTLWWHAHSSFLRATVHGAFIIRPRPGNSYPFPAPDKEVPIVLGEWWNQNVVDVESDAVMAGQLPVESDAFTINGKTGLLYQCANDTFTVDVEPGKTVLLRVINAGLNAHLFVKLAGHNFTVVAVDAGYTSNLNTDTLVLAPGQTVDTLVSTNAAPGSYYLAVQAHDTLTPSTMAASDATTATAILTYNGTSATATAAMPTMPSSSDAATANAFYFGLRGLATPGSPAVPATVDVSMTIELGLGQLPCDPSQTKCSGNAVAASMNGVSFRLPSEASLLGAHLT…
LAC17.1	Al_clc_g7022	MAASSALPCSLLIAAIVLLSVIVQAQGITRRYDFNVTMANVTRLCASKSIITVNGQFPGPQIVAREGDRLVIRVTNHVQHNISLHWHGIRQLRTGWADGPAYIAQCPIQTGQSYVYNFTITGQRGTLWWHAHISWLRATVYGAVVVLPKLGVPYPFPAPHKEVPVIFGEWWMADTEVIISQALQTGGAPNVSDAYTINGLPGPLYNCSAQDTFKLKVKPGKTYMLRLVNAALNGELFFSIANHSLTVVEVDAVYVKPFTVGTLVIAPGQTTNVLLTAKPSYPGANFYMSALPYSTTRPGTFDNTTVAGILEYQCPEEPSSSPSFNKALPLIKPTLPQMNDTNVVGNFTAKLHSLATPEYPAAVPQSVDRRFFFTVGLGTLPCPVNTTCQGPTNTTQFAA…
LAC17.2	Al_clc_g7023	MASSYFVPCSVLVAVLVLFSVNVAEAAIQEYQFDVQMTNVTRLCSSKSIVTVNDQFPGPTVFAHEGDLIVVRVVNHVPYNMSIHWHGVRQLRSGWADGPAYITQCPIQSGQSYVYKFTITGQRGTLWWHAHISWLRATVYGPIVILPKPGVPYPFPAPHKEVPIMFGDQALQTGGGPNVSDAFTINGLPGPLYNCSAKDTFKLKVQPGKTYMLRIINAALNDELFFSIAGHPLTVVDVDAVYVKPFTVETIAITPGQTTNVLLTTKPSHPSATYYMLAAPYSTAASGTFDNTTVAGILEYEEPWSPSAAPAFNKNLPVFKPTLPQINDTSFVANYTAKLRSLASAQYPADVPREVDRRFFFTVGLGTHPCAVNGTCQGPNGSRFAASINNVSFVLPTTA…
LAC11.1	Al_clc_g8981	MAGRYSNGALVLLTCICLFIASAKAEAPYRFFDWEVTYGEISPLGFPQQGILINGQFPGPEIECQTNDNLIINVRNSLPEPFLLSWNGLQHRKNSWQDGVSGTNCPIPPGQNFTYRMQAKDQIGSFFYFPSLAFHKAAGGFGAIRIRSRPHIPVPFPPPADEYTMLIGDWYNTSHKALQDVLDGGTELPSPDAILINGNGSGVANFTVEQGNTYRLRISNVGLQNTLNVMIQDHNMTLVEVEGTHTVQNSYTSLDVHAGQSISVLVTADGPARDYLVAVSTRFGNSSLNSTAVLRYTGSTGPAASAGPLLAGPIDVDFDFSLNQARSIRTNLTASGPRPNPQGSYHYGSINVTRTIRLASSSGDVGGKLRCAVNGVSYVEADTPLKLADYYNISGVFRL…
LAC12.1	Al_clc_g9248	MASSSSSRLLFLLSCLALALLANAQEVHQHEFVVQETPVKRLCNEHHIITVNGQFPGPTLEVREGDTLEINVINRAQYDLGTPWADGPEFVTQCPIKPGESYKYRFTIKGQEGTLWWHAHSSWLRATVYGALIIRPREGKAYPFGKPSREAPVILGEWWNANPIDVVREAQSTGGAPNVSDAFTINGQPGDFYNCSQKETTAIPVKPGETALLRFINAALNHELFVSIAQHRMTVVGVDASYTKPFTTDVLMIAPGQTTDVLVTMDRPPTRYYIAARAYVSAQGVPFDNTTTTAIIEYDCGCATEFGPKIQPAFPALPALNDTAAATAFAAGIKSPEDVKVHEHADEYLFFTVGLGLFNCEPGELCAGPNNNTRFTASMNNVSLVFPKKDSILHAHYYK…
LAC11.2	Al_clc_g10563	MGTPQKVILINDMFPGPTINCTSNNNIVINVFNMLDEPLLFTWHGIQQRKNSWQDGMPGTMCPIKPGTNFTYHWQPKDQIGSFFYFPSIGMQRSAGGYGLISVHSRDLIPVPFDRPADDFPVLVGDWYTKDHTVLAKHLDAGKSIGRPAGLIINGKNEKDASDPPMYNFEAGKTYRFRVCNVGIKASLNVRVQGHNLKLVEMEGSHTVQNSYDSLDVHVGQCLSFLVTADQKPADYFLVVSTRFIKEASTITAVIRYKGSNTPPSPKLPEGPSGWAWSINQWRSFRWNLTASAARPNPQGSYHYGQINITRTIKLSTSRGKVDGKERYAINGVSHVDAETPLKLAEYFNATDGVFQYNLISDVPPKSGTPIKMAPNVLSAEFRTFIEVVFENPEKSIDS…
LAC5	Al_clc_g12877	MAAMARSSLGMKLRSSSALLLVLLGCFLLQSALAEERFYEFVVKETPVKRLCMTHNIITVNDQFPGPTIEVYNGDTLAIKAINHGRYNVTLHWHGVRQLRNGWADGPEFVTQCPIRPGGSYTYRFTIQEQEGTLWWHAHSSWLRATVHGALIIHPKRGLPYPFPKPHKERDPIAVLRQSMITGAPPNVSDTFLINGQPGDLLPCSSQETSIIPVVAGEMNLLRIINAAMNAELFVSLAGHKMTVVAADAMYTKPFETNILLLGPGQTTDVLVTAHAAPGRYYLAARAYASAQNVPFDNTTATAILQYKNAPGCPTATGAGAGGFKGPVGRSGASGHPHPGRNGPPPMLPFLPAFNDTNTATVFSNSLRSPAPVKVPHPVTQELFTTVGLGLFNCRPGPF…
LAC16.2	Al_clc_g13079	MATMRAAAAGVLLVLSAMAVVHAEDPYLFFEWKVTYGTKSLLGVPQKVILINGEFPGPRINCSSNNNIVVNVFNQLDQPLLFTWSHRKNSWMDGMQGTQCPIAPGTNFTYKWQPKDQIGSFFYFPSLGMQRAAGGYGPISVVSRLLIPVPFDPPAEDHVVLIGDWYTKDHEVMARLLDAGRSIGRPAGVLINGKGGKEAAAAPMFTFEAGKTYRFRVCNTGIKSSLNFRIQGHDMRLVEMDGSHTVQDMYDSLDVHAGHCFSVLVDADQKPGDYYMVASTRFIHDPKSVSAVVRYAGSNTPPAPNVPEPPEGWAWSLNQWRSFRWNLTASAARPNPQGSYHYGQINITRTIKLLISRGHIDGKLRYGFNGVSHVDADTPLKLAEYFNVTDGVFKYNQMG…
LAC16.1	Al_clc_g13683	MNGAGIVLQDLPSMPPRAFNYTDPALIPVVPGGELEKLEPSRKATTMRRFAHNITVEVVFQSTATMQSDSNPMHLHGHDFFVLAQGLGNYDPAKHVSSYNLVDPLLKNTVQVPRLGWAAIRFVADNPGTWFMHCHFEFHIAMGMATVFEVANGPMPEDILPPPPPDLPKCTNRNE
LAC6	Al_clc_g13795	MPRLLALAAALLLVGPAQAADPYAFFDWDVSYVTAAPLGGTGHRQVIGINGKFPGPVVNITTNWNVVVNVLNDLDEPLLITWNGIQHRKNCWQDGVLGTNCPIPSGWNWTYEFQVKDQIGSFFYFPSTGLQRAGGGYGGVIVNNRDVIAVPFGRPDGDITILIGDWYNKNHTDLRKMLDSGKDLGMPDGVLINGKGPYRYNDSLVPAGIEYETFNVHPGRTYRIRVHNVGTSTSLNFRIQGHNMLLVETEGSYTTQQNYTNLDVHVGQSYSFLVTTDQNASSDYYVVASARMVNESQARRPARSPTRPRTRTTRPSP
LAC17.3	Al_clc_g15683	MKPPYLALLVLFGTLLVLPQASVGTTRYYTFNVTMQNVTRLGTTRAIPTVNGKFPGPKIVTRDGDRVVVKVVNNVKDNVTIHWHGVRQLRTGWYDGPAYVTQCPIRTGRSYVYNFTVTGQRGTLFWHAHVSWMRATLYGPIVIFPKRGVPYPFPKPDKEIPVVFGEWFNADPEAIIAQALRTGAGPNVSDAFAINGLPGPLYNFSSKDTFKLKVQPGKLYMLRLINAALNDELFFSIANHTLTVVDVDASYVKPFDTDIVLITPGQTANVLLRAKPHAGCPPATHLMLLRPYSTANPGTFDNTTAAGVLEYAPPGHIKTRPLFRPALPPINDTAFVANFSARLRSLASPEYPANVPRRVDRAFFFTVGLGTNPCPANQTCQGPNGTKFAASINNVSFDM…

## Sheet: CDS sequence
AlLAC CDS sequence
Gene ID	Accession number	CDS sequence
LAC14	Al_clc_g4455	ATGGGTGCAGTTAGGGTTCCTGCAGTGCTTTGGCTGCTGCTAGGTGTGACGTTAACCTTTGGTGTTGCAGTTACCCCAGCCCAAGCATCCAGGGCTCATCACTACGATTTCTTTATAAAGGAAACCAACGTCACCAGGCTCTGCCACCAGAAGACCGTCCTCACCGTGAACGGCCAGTTCCCCGGCCCGACCATCTACGCGCGCAAGGGCGACGTCGTCGTCGTCAACGTCTACAACCAGGGCGACAAGAACATCACCATCCACTGGCACGGCGTGGACCAGCCGCGTAACCCGTGGTTCGATGGGCCGGAGTACATCACGCAGTGCCCGATCCAGCCCGGCGCCAACTTCACGTACCGGATCATCTTCTCCGAGGAGGAGGGCACGCTGTGGTGGCAC…
LAC7.2	Al_clc_g5179	ATGGCACTTCCGATTGCAGCAGCCCTGCTCTTATACGCTGTCCTGGCCCTCTCTGGAGCGGCAGGTAGCAAAGCGGCGGTCGTCAACCACACGTTTGTTATAAAGCAAGTGTATATGCAACACCTTTGCAATGAAACGCTTGTCACTGTGGTGAACGGTCAGTTTCCAGGCCCACCCATAGAGGCTACAGAAGGGGACACAGTGGTTGTACAAGTTGTCAACGAGTCACCCTTTGGAATAACAATTCACTGGCATGGTGTAAAGCAGCGATTAACTTGTTGGGCTGATGGAGCCGAAATGATAACACAATGCCCAATCCAGCCAAACACTACATTCACGTACAAGTTCAACGTCGACGGCCAGGAGGGTACGCTATGGTGGCACGCTCACGTCTCCATC…
LAC7.1	Al_clc_g5589	ATGCCTCGTTCTTGGCGGATCCTAGTGCTTTCTCTGTTTTGCACTGCAACTCTAGTGCACGCTGCTACTGTTGAGCATACGTTCAATGTTGGGACACTGTCTATACCGCGCATATGCCAGCCGGGGAACATAACCGTCACCGCCGTGAATGGACGAGTGCCCGGTCCCGTGATCCAAGCGACGGAAGGTGACACCGTGGTGATCCACGTCGTCAATGACTCTCCATACAACGTGACAATCCACTGGCACGGCGTGTTCCAGCGGCGCACGCCGTGGGCCGACGGCCCGTCCATGGTGACGCAGTGCCCGATCCGCCCCGGCGGCGCGTACACGTACCGGTTCGCCGTGGCCGGGCAGGAGGGCACGCTGTGGTGGCACGCGCACAGCTCCTTCATGCGC…
LAC7.3	Al_clc_g5590	ATGGTGCAGCTTTTGCTGGTGTTTGCCCTTCTTCTTGTTGGACCAGTGGCAGATGCGGCGACGGCGAAATACACATTCACAGTGGCAAGTATGCAAATCAGTCAACTATGCAAGACCACTGACATTATTGCGGTGAACGGCCAGCTGCCCGGCCCGGCGATAGAAGTGAACGAAGGAGACGCGGTTGTTGTCAATGTCATCAACGCTTCGCCATACAACTTAACCATTCACTGGCATGGTGTGGTCCAGCTATTGACACCATGGGCGGATGGCCCGAGCATGGTGACGCAGTGCCCCATCCAGCCCAACAGCTCGTACACGTACCGGTTCAGCGTCCCGGGGCAGGAGGGCACGCTGTGGTGGCACGCCCACTCCTCCTTCCTCCGCGCGACGGTGCAC…
LAC17.1	Al_clc_g7022	ATGGCTGCCTCCTCTGCTCTTCCTTGCTCTCTCCTCATTGCAGCCATAGTGCTTCTCTCCGTCATCGTCCAAGCGCAAGGCATCACGAGGCGCTACGACTTCAACGTGACCATGGCGAACGTGACACGCCTGTGCGCGAGCAAGAGCATCATCACGGTTAACGGGCAGTTTCCCGGCCCTCAGATCGTCGCGAGGGAAGGCGACCGCCTCGTCATTCGCGTGACCAACCACGTCCAGCACAACATCTCGCTGCACTGGCACGGCATCCGGCAGCTGCGGACGGGGTGGGCCGACGGGCCGGCCTACATCGCGCAGTGCCCGATCCAGACGGGGCAGAGCTACGTCTACAACTTCACCATCACCGGGCAGCGCGGCACGCTGTGGTGGCACGCGCACATC…
LAC17.2	Al_clc_g7023	ATGGCTAGCTCCTACTTCGTCCCCTGCTCTGTGCTCGTCGCTGTGCTCGTCCTGTTCTCCGTCAACGTGGCGGAGGCTGCCATCCAGGAGTACCAGTTCGATGTGCAAATGACGAACGTGACGCGGCTGTGCAGCAGCAAGAGCATCGTGACGGTGAACGACCAGTTCCCTGGGCCGACGGTCTTCGCGCACGAGGGCGACCTCATCGTCGTCCGGGTCGTCAACCACGTCCCCTACAATATGAGCATCCACTGGCACGGCGTCCGGCAGCTGCGGAGCGGGTGGGCGGACGGGCCGGCGTACATCACGCAGTGCCCGATCCAGAGCGGGCAGAGCTACGTGTACAAGTTCACCATCACGGGGCAGCGCGGCACGCTGTGGTGGCACGCGCACATATCG…
LAC11.1	Al_clc_g8981	ATGGCGGGAAGATACAGCAATGGAGCTCTGGTTCTTCTTACGTGCATCTGCCTGTTCATCGCCTCCGCGAAGGCGGAAGCTCCGTACAGATTCTTCGACTGGGAGGTCACCTACGGCGAAATCAGTCCCCTGGGATTTCCGCAACAGGGAATTTTGATCAACGGGCAGTTTCCGGGGCCAGAAATCGAGTGCCAGACGAACGACAATTTGATCATCAACGTGCGCAATAGCTTACCGGAGCCATTCTTGCTGTCATGGAACGGTCTTCAGCATCGCAAGAACTCATGGCAGGACGGCGTGTCCGGCACGAACTGCCCGATCCCGCCAGGCCAGAACTTCACTTACCGCATGCAGGCCAAGGACCAGATCGGCAGCTTCTTCTACTTCCCGTCGCTGGCG…
LAC12.1	Al_clc_g9248	ATGGCTTCGTCCTCGTCGTCCCGGCTGCTCTTCCTCCTCTCGTGCCTCGCGCTTGCCTTGCTCGCCAACGCCCAAGAAGTGCACCAACATGAGTTCGTGGTCCAAGAGACGCCGGTGAAGAGGCTGTGCAACGAGCACCACATTATCACGGTGAACGGGCAGTTCCCGGGGCCGACGCTGGAGGTCAGGGAGGGCGACACCCTCGAGATCAACGTCATCAACCGGGCGCAGTACGACCTGGGAACGCCGTGGGCGGACGGGCCGGAGTTCGTGACGCAGTGTCCCATCAAGCCGGGCGAGAGCTACAAGTACAGGTTCACCATCAAGGGACAGGAAGGCACGCTGTGGTGGCACGCGCACAGCTCCTGGCTCAGGGCCACCGTCTACGGCGCGCTCATC…
LAC11.2	Al_clc_g10563	ATGGGGACGCCGCAGAAGGTGATCCTCATCAACGACATGTTCCCGGGCCCAACCATCAACTGCACCTCCAACAACAACATCGTCATCAATGTCTTCAACATGCTCGACGAGCCGCTCCTCTTCACCTGGCACGGAATCCAGCAGAGGAAGAACTCGTGGCAGGACGGCATGCCGGGCACCATGTGCCCCATCAAGCCAGGAACCAACTTCACGTACCACTGGCAGCCCAAGGACCAGATCGGCAGCTTCTTCTACTTCCCCAGCATCGGCATGCAGCGCTCGGCGGGCGGCTACGGCCTCATCAGCGTGCACAGCCGTGACCTGATCCCCGTCCCGTTCGACCGCCCGGCCGACGACTTCCCGGTCCTCGTGGGCGACTGGTACACCAAGGACCACACC…
LAC5	Al_clc_g12877	ATGGCAGCGATGGCGAGATCAAGTCTCGGCATGAAACTCCGCTCCTCCTCTGCTCTCCTTCTTGTGCTTCTCGGGTGCTTCCTGCTCCAGTCCGCCCTCGCGGAGGAGCGCTTCTACGAGTTCGTCGTGAAGGAGACGCCAGTGAAGAGGCTGTGCATGACCCACAACATCATCACGGTGAACGACCAGTTCCCGGGGCCAACGATCGAGGTGTACAACGGCGACACGCTGGCGATCAAGGCCATCAACCACGGCCGGTACAACGTGACCCTGCACTGGCACGGGGTCCGGCAGCTGCGGAACGGGTGGGCGGACGGGCCGGAGTTCGTGACGCAGTGCCCGATCCGCCCCGGCGGGAGCTACACGTACCGGTTCACCATCCAGGAGCAGGAGGGCACG…
LAC16.2	Al_clc_g13079	ATGGCGACGATGCGCGCGGCGGCCGCCGGCGTGCTGCTAGTGCTGTCGGCGATGGCGGTGGTGCACGCCGAGGACCCGTACCTGTTCTTCGAGTGGAAGGTGACGTACGGGACCAAGTCCCTGCTGGGCGTGCCCCAGAAGGTCATCCTCATCAACGGCGAGTTCCCCGGGCCCAGGATCAACTGCTCCTCCAACAACAACATCGTCGTCAACGTCTTCAACCAGCTCGACCAGCCGCTCCTCTTCACCTGGTCCCACCGCAAGAACTCGTGGATGGACGGGATGCAGGGCACGCAGTGCCCGATCGCGCCGGGCACCAACTTCACGTACAAGTGGCAGCCCAAGGACCAGATCGGCAGCTTCTTCTACTTCCCGTCGCTCGGCATGCAGCGCGCGGCG…
LAC16.1	Al_clc_g13683	ATGAATGGTGCCGGCATTGTGCTACAGGACCTTCCTAGCATGCCGCCAAGGGCATTTAACTACACCGACCCTGCATTGATTCCAGTCGTCCCTGGCGGGGAGCTGGAGAAGCTCGAGCCTTCACGGAAGGCGACGACAATGAGGCGATTTGCACATAACATCACAGTCGAAGTGGTTTTCCAGAGTACTGCAACAATGCAGAGCGACTCCAACCCAATGCATCTCCATGGACACGATTTCTTCGTGCTTGCTCAGGGTCTTGGTAACTACGACCCGGCGAAGCATGTGAGTAGCTACAACCTGGTGGACCCACTACTGAAGAACACCGTACAAGTGCCAAGGCTTGGATGGGCTGCCATTCGGTTTGTCGCCGACAACCCAGGGACCTGGTTCATGCAT…
LAC6	Al_clc_g13795	ATGCCGCGGCTACTCGCGCTGGCGGCGGCGCTGCTGCTTGTTGGGCCGGCGCAGGCCGCCGACCCCTACGCCTTCTTCGACTGGGACGTCTCCTACGTCACCGCGGCGCCGCTCGGCGGAACCGGCCACCGACAGGTGATTGGCATCAACGGCAAGTTCCCGGGCCCCGTCGTGAACATCACCACCAACTGGAACGTCGTCGTCAACGTGCTCAACGACCTCGATGAGCCGCTCCTCATCACCTGGAACGGGATCCAGCACCGGAAGAACTGCTGGCAGGACGGGGTGCTGGGCACCAACTGCCCCATCCCGTCCGGCTGGAACTGGACCTACGAGTTCCAGGTCAAGGACCAGATCGGCAGCTTCTTCTACTTCCCCTCCACCGGCCTGCAGCGCGCC…
LAC17.3	Al_clc_g15683	ATGAAGCCGCCCTACCTTGCATTGCTGGTGTTATTTGGCACTTTGCTGGTGTTGCCGCAGGCTTCGGTCGGCACGACGAGATACTACACCTTCAATGTTACAATGCAGAACGTGACGCGGCTAGGCACCACCCGTGCCATCCCGACGGTGAACGGCAAGTTCCCCGGCCCCAAAATAGTCACCAGGGATGGCGATCGCGTCGTTGTCAAGGTGGTTAACAATGTCAAGGACAACGTGACCATCCACTGGCACGGAGTCCGGCAGCTGCGAACGGGCTGGTACGACGGGCCTGCGTACGTGACGCAGTGCCCGATCCGGACGGGGCGGAGCTATGTCTACAACTTCACCGTGACAGGGCAGCGGGGCACGCTCTTCTGGCACGCGCACGTCTCCTGGATG…

## Sheet: Promoter sequence
AlLAC promoter sequence
Gene ID	Accession number	promoter sequence
LAC11.1	Al_clc_g8981	aaatcttaatctttaactaataaccgacattttattttgtagattttaggatacatatcaatgtcatgagagtgcaacaggttacaatactattccttctgtctcagaataaatgttattttagaatttatcaaagttaacgtaagttaagtttgactaaatttataaataaaattatcaatatttacgacataaaataagtatattatgaaaacagattttaatatgagccttatgatactaatttaatgtccaaagttaggatttttttcaacaaagttagtcaaatttgagacaacttgactgtgaccaaatctaaagtgacacttattatgtgatggaggcagtaggagatttgtaagtggttcaaaattgtgaagttgaataatgtttaccatt…
LAC12.1	Al_clc_g9248	gtagctggaactggaaaccacacctaaatgcgttgaaacaccttttttcgttgttaactgttatcgtaaaacaatctactgctacatggacaggacacatgcatgggttgcatgcgggttggttcctacaaactcagacgcaaaacgaggaactgtgagggctgccacggctggttttgttgcaggatctgaattgagggcgcaactgagatgcaaaaggagtaactgagagcatctccaatagctttctcagtaattcacttctaatacggtggtattgagaggttcctaatatcatttttagaatattggaagtggatggtacagtaatcttctaataatttactgtgctcagtggaacctacagtgatgtacatatcttcttcttcattcatcctc…
LAC6	Al_clc_g13795	ggcacgggcccatgcacgtgcaccgcttgctctcaccgtcgcatgcaccgaccggagccaatggccgcggccccccacccaccccaagcaatccggatcccgcaccgcggggaccgaccggctcgcgatcgcctggccgttccgttcgctggcgcctcggtcgacggcggcgcatgtgcgagcgcgatcgacatgggctcgcggcctcgcttgaccgtagtccgatccggcgaagattttataattcttattacaagtggctgcgagtccaggctttcaatgtgttaagatgggcgtgcacaccccatccatagtttgttttcctcccactttatgcagtgttattatcttaaaaaaactttgtgcagtgttgatcgatgcagcacatattgatttgcc…
LAC14	Al_clc_g4455	ttgtcaaccgcatataccgaacagtacgcgcgtattctaatttaatatctagtaggtagcaaggatataacggatttgacagttcaatgaaaaagaagtgtcttccttatttggcatgtgtgcgtgtctgcgttctaaagttcggtccacgttatccgcgttcatcagctaccaagtgccaaattgatcacctcagccttcaaaactaagcatgaaccaatcaatagtctaaattaacattactaggtagcttagcgcccagagtcaagcatatgccagccctgtatatgcggttccgatcggaactccacgcatatgcacgcgcgttggaagctcgcgttccctattgacgaccccttcatccagtcgaacgcatatgcttttaaccgacgatgtcgc…
LAC7.2	Al_clc_g5179	aaaattacccaagcaaacacctgctgttgttgctgatatgtacaatccattaactaatcttgctttttgacacgtattttatcttaaaattatggcatccaacctcttttatttttcaggttctcgcgctgcataagccacagcgcgcgaccggtggccctactcttgccaaaggcaaagctccgcccctggtcgggctctacagtatgtgattgttgttgtgatactaaccttgctcgtatatattattaacaacgactcaggtttaacttgctgtgatacggacctaataacgtgttcgccgcgtagcaatcgcgttttggcggtacgctttgttttggtttgtcctgtgtttgctttgtctagtataattgtacagcctgtcaccactgtacaatt…
LAC7.3	Al_clc_g5590	actgaatttaaattttggatttgaaaaaaaaaattcttcagcggaactggggattccttgcttctctgaagcctaagaatgctttttgttcgttcacccactctgatagtccatatatacctagagttgagtgcaagtacacagtgcactaattacacatgtgacagcacattagttccaataatgttcaccgaattcaactctgcgagacccgttttgttggcataattgtttcgtttttgggagcagattgttgttgtctagtagctaagttccgcgttcagaatttcagagcaccggttaaggcttaccttgttcgcctcagcttcgagagctgcttttcttgaccggaaaggtcgttagggacaaccgagagacatgtggttggttattcctgaa…
LAC17.2	Al_clc_g7023	gtgacatgctaaccggctcagcttcagcgtcacggatctcccggttcatattacattttctatcatgcaagcctggccacgcctggccgcgacgccaatcagagaacggacctaacttacgatccagctagctccggtcgttgtcttcactagctccggcgatcgatggatcccttggcatgtaaggctgtgttaggagccctgcaaagttgtgatcttcaacagctccacttggtgccgcctctgacctttagattcgaaccaagctgaattcaactacttctgattgaacacattatctagtatcgatctgtgttaggtggggtaagcaaacacctcaagctggtgaacaagcatgtgtgcaaggtgagttcaacatcagtactggaaagtgaggcg…
LAC17.1	Al_clc_g7022	tgcacgcatatatgtgatgtttcgattgaaccgcagaacctaactaggaaggtaacatctgtgcagagtatctagaagacattttccgcaggtgagaacagtttttcaacaccgaagcctgttgatgaattcatattttgccggtttagatgtcaacgtccctaggatatatatggagtaaattttctatactcgtgaagctatttcgcattcgcttctaaagagttattagggacagatttcgacatgtgagctcttactatttcgttgggggtccataatccagaagtagcaagtatacgggctcagggaccaatgagccatcatcgtcatcttaaattgtcaaaaaatgtcaaaatctagtgtgtaggacaagatcttcataggaacatgtgtaca…
LAC5	Al_clc_g12877	aagtaggctagttcaattaccctaactaatcagatggcacctgcgtcgcctccaggccacctactcgctgaaaactgaggaattgttcaggtggagtggaaaaaagagtgctgattgacttcgcttttgttaaacaatctactaactcctacagtgttcaagatttggagatattctgttacagcaaagtcatgtactagataatttgtatagtctgcggcgccgcgttttccaactggaccggtagctgaaagtgcaaacctttcgaattctgttttgcagtctctttcagagtcccaaccctagaggcatgccatgtttcataaaaaaataattctggagaacatttttcatgtacaatgtgaactacagatttagagctttttggttgatttgaaa…
LAC16.1	Al_clc_g13683	aagcatcaaggccaccaattccaagatgtatatattagcatgcaatattctgatcgatgttacttgcaggtgaatggtggcagatgaatttgacaaacgtgtacgggaacttcaccaacgaggcattactcagtgaaaacattacggcacctaccagcaatgcaaagcctgctgagacccctgctgcagatgctgctgatacgcgtggcgacaaccccgctgcagctaccatcaatggaaagcttggtgatctcaacaactgctccggtgaaatactgtccctgtgcattttaattcaatgttgaagtatcttctgaaaatttgacaaaaataaaataagataccctgtgtattgtgttctgcaggggtaacagaagacagcttcattttgaatgtgga…
LAC17.3	Al_clc_g15683	cttcgcctacccgcgtccaactcccaatcgatgcgatggttgatacccgagaggattcggatcgttcaaacatgaattcagcattcctgatgtaccaaaactggattcggatattggagaggcaacgcttagaagctatatgattcagtcatggatggatgatcttgacctgatgccatagtgtcccgtcagctgcctgttcagctcatggtcttgactcttgaagtcttgagctggcaggcaccctgtaagtgcgtaggttgcggtgttataatctctgcttattcgtcagtcattccgtgcatatgatggaaaccgtggcgaatttaaccaccaagcgatgatcggatccgcgccaagtgttaatccgaaaatcattgatcagatgcgacaatgaaa…
LAC7.1	Al_clc_g5589	tgcaccattgggagtgccctaaggctcatacccatatgattttatcagacttttagctaccactagccgcatacataattattgacttaagttatacaaccgaagtatcttgcggacaaagtgtgtgaacacagagattctctctcatactaatctcgaatctagaaatctaatcataggaagtattcgggaactaactaatccgtcaatagtctacaacagcgtaatggcgaatatggtttaaaattcacaaggaaaagtataataagatgtaaggaatcacaaggcacgtcatgcatgcaggtcaagtctaggaagtagttgggcatggtagttgtcgtttagaatctctcggcacagtcttgtggttcgatcatcctgtggaaaaattgctgcaca…
Sequence data derived from
Aeluropus genome version 1 (Hashemi-Petroudi et al., 2022)
