# Supplementary material for: Genome-wide analysis of the laccase (LAC) gene family in Aeluropus littoralis: A focus on identification, evolution and expression patterns in response to abiotic stresses and ABA treatment
Source: Front Plant Sci. 2023 Mar 1;14:1112354. doi: 10.3389/fpls.2023.1112354 (PMC10014554; doi:10.3389/fpls.2023.1112354)
Supplement: Supplementary Table 3 — Sequence and logo of conserved motifs distributed in AlLAC proteins. [file Table_3.xlsx]

## Sheet: Motif logo and sequence
Motif logo of AlLAC
MotifID	Motif Seq	MotifID	Length
MEME-1	YNLVDPVERNTVAVPAGGWAAIRFVADNPGVWFMHCHLDVH	MEME-1	41
MEME-2	YVTQCPIQPGQSYTYRFTVKGQEGTLWWHAHSSWLRATVHG	MEME-2	41
MEME-3	TKVKVLRYNAVVEVVLQDTSILGAESHPMHLHGFBFFVLAQGFGNYDPAK	MEME-3	50
MEME-4	GKTYLLRVINAALNAELFFSIAGHNLTVVEVDASYTKPFTTDTLDVAPGQ	MEME-4	50
MEME-5	IITVNGQFPGPTIEATEGDTVVVNVVNHVPYNITIHWHGVRQLRTGWADG	MEME-5	50
MEME-6	WGLAMAFLVEDGPLPDQKLPPPPPDLPKC	MEME-6	29
MEME-7	PYPFPKPHKEVPVJIGEWWNAD	MEME-7	22
MEME-8	GGPPNVSDAFTINGKPGDLYNCS	MEME-8	23
MEME-9	CGGPNNTRFAASINNVSFVLP	MEME-9	21
MEME-10	RYYMAARPYATAQPVPFDNTTATAILEY	MEME-10	28
