# Supplementary material for: Genome-wide analysis of the laccase (LAC) gene family in Aeluropus littoralis: A focus on identification, evolution and expression patterns in response to abiotic stresses and ABA treatment
Source: Front Plant Sci. 2023 Mar 1;14:1112354. doi: 10.3389/fpls.2023.1112354 (PMC10014554; doi:10.3389/fpls.2023.1112354)
Supplement: Supplementary Table 4 — Gene ontology (GO) enrichment of AlLAC-interaction network. [file Table_4.xlsx]

## Sheet: Sheet1
Biological Process
GO term	Description	Count in network	FDR
GO:0018283	Iron incorporation into metallo-sulfur cluster	2 of 2	0.0011
GO:0046274	Lignin catabolic process	16 of 18	2.83e-09
GO:0043903	Regulation of symbiotic process	2 of 6	0.0037
GO:0006783	Heme biosynthetic process	3 of 23	0.0007
GO:0006826	Iron ion transport	7 of 60	6.35e-09
GO:0009808	Lignin metabolic process	7 of 61	6.35e-09
GO:0009833	Plant-type primary cell wall biogenesis	3 of 27	0.001
GO:0019853	L-ascorbic acid biosynthetic process	2 of 20	0.0208
Molecular Function
GO term	Description	Count in network	FDR
GO:0031071	Cysteine desulfurase activity	2 of 2	0.0015
GO:0004347	glucose-6-phosphate isomerase activity	2 of 2	0.0015
GO:0004325	Ferrochelatase activity	2 of 3	0.0023
GO:0047334	diphosphate-fructose-6-phosphate 1-phosphotransferase	2 of 4	0.0033
GO:0052716	Hydroquinone:oxygen oxidoreductase activity	6 of 17	2.86e-10
GO:0004322	Ferroxidase activity	8 of 25	2.19e-13
GO:0016688	L-ascorbate peroxidase activity	2 of 8	0.0088
GO:0016760	Cellulose synthase (udp-forming) activity	3 of 26	0.0014
GO:0005507	Copper ion binding	8 of 158	2.08e-08
GO:0016209	Antioxidant activity	4 of 151	0.0072
GO:0016491	Oxidoreductase activity	16 of 1202	1.24e-09
GO:0046914	Transition metal ion binding	10 of 915	8.23e-05
Cellular Component
GO term	Description	Count in network	FDR
GO:0048046	Apoplast	8 of 424	0.00012
GO:0005576	Extracellular region	13 of 1605	0.00012
GO:0009536	Plastid	12 of 2275	0.0103
GO:0005886	Plasma membrane	13 of 2757	0.0116
GO:0071944	Cell periphery	15 of 3265	0.0057
