# Supplementary material for: Genome-wide analysis of the laccase (LAC) gene family in Aeluropus littoralis: A focus on identification, evolution and expression patterns in response to abiotic stresses and ABA treatment
Source: Front Plant Sci. 2023 Mar 1;14:1112354. doi: 10.3389/fpls.2023.1112354 (PMC10014554; doi:10.3389/fpls.2023.1112354)
Supplement: Supplementary Table 5 — Functional category of AlLAC promoter element. [file Table_5.xlsx]

## Sheet: AlLAC result
Functional category of AlLAC promoter element
Function	No. of elements
Common cis-acting	303
Growth and development	1
Light responsiveness	50
Phytohromen	83
Stress-related	56
TF-binding site	103
Tissue-specific	8
Unknown function	201
Total	805
Genes	No. of elements
AlLAC11.1	63
Common cis-acting	32
Light responsiveness	2
Phytohormone	1
Stress-related	5
TF-binding site	8
Tissue-specific	1
Unknown function	14
AlLAC12.1	68
Common cis-acting	15
Light responsiveness	4
Phytohormone	3
Stress-related	8
TF-binding site	11
Tissue-specific	1
Unknown function	26
AlLAC14	62
Common cis-acting	23
Light responsiveness	7
Phytohormone	8
Stress-related	5
TF-binding site	4
Unknown function	15
AlLAC16.1	68
Common cis-acting	23
Light responsiveness	4
Phytohormone	8
Stress-related	8
TF-binding site	6
Unknown function	19
AlLAC17.1	61
Common cis-acting	23
Light responsiveness	3
Phytohormone	7
Stress-related	1
TF-binding site	8
Unknown function	19
AlLAC17.2	63
Common cis-acting	17
Light responsiveness	5
Phytohormone	7
Stress-related	4
TF-binding site	10
Tissue-specific	1
Unknown function	19
AlLAC17.3	76
Common cis-acting	31
Growth and development	1
Light responsiveness	2
Phytohormone	9
Stress-related	4
TF-binding site	11
Unknown function	18
AlLAC5	70
Common cis-acting	28
Light responsiveness	1
Phytohormone	6
Stress-related	7
TF-binding site	8
Tissue-specific	2
Unknown function	18
AlLAC6	54
Common cis-acting	17
Light responsiveness	4
Phytohormone	7
Stress-related	3
TF-binding site	4
Tissue-specific	2
Unknown function	17
AlLAC7.1	55
Common cis-acting	21
Light responsiveness	5
Phytohormone	8
Stress-related	1
TF-binding site	11
Tissue-specific	1
Unknown function	8
AlLAC7.2	82
Common cis-acting	36
Light responsiveness	8
Phytohormone	14
Stress-related	5
TF-binding site	8
Unknown function	11
AlLAC7.3	83
Common cis-acting	37
Light responsiveness	5
Phytohormone	5
Stress-related	5
TF-binding site	14
Unknown function	17
Total	805

## Sheet: AlLAC motif data  
Motif distribution of AlLAC promoter element
Gene ID	Motif ID	Motif sequence	Position	Length	Strand	Main Function
AlLAC5	CAT-box	GCCACT	640	6	-	Tissue-specific
AlLAC5	RY-element	CATGCATG	628	8	-	Tissue-specific
AlLAC5	ACE	CTAACGTATT	483	9	+	Light responsiveness
AlLAC5	W box	TTGACC	572	6	+	TF-binding site
AlLAC5	MBS	CAACTG	233	6	+	Stress-related
AlLAC5	GC-motif	CCCCCG	751	6	+	Stress-related
AlLAC5	Unnamed__2	AACCTAACCT	857	9	+	Unknown function
AlLAC5	Unnamed__1	CGTGG	960	5	-	Unknown function
AlLAC5	MYB	CAACCA	386	6	-	TF-binding site
AlLAC5	STRE	AGGGG	819	5	+	Stress-related
AlLAC5	STRE	AGGGG	829	5	+	Stress-related
AlLAC5	CGTCA-motif	CGTCA	534	5	-	Phytohromen
AlLAC5	CGTCA-motif	CGTCA	656	5	+	Phytohromen
AlLAC5	CGTCA-motif	CGTCA	755	5	+	Phytohromen
AlLAC5	MRE	AACCTAA	857	7	+	TF-binding site
AlLAC5	as-1	TGACG	534	5	+	TF-binding site
AlLAC5	as-1	TGACG	656	5	-	TF-binding site
AlLAC5	as-1	TGACG	755	5	-	TF-binding site
AlLAC5	WRE3	CCACCT	57	6	+	Stress-related
AlLAC5	WRE3	CCACCT	89	6	-	Stress-related
AlLAC5	Myb	CAACTG	233	6	+	TF-binding site
AlLAC5	CAAT-box	CAAT	14	4	+	Common cis-acting
AlLAC5	CAAT-box	CAAT	82	4	-	Common cis-acting
AlLAC5	CAAT-box	CAAT	114	4	-	Common cis-acting
AlLAC5	CAAT-box	CAAT	135	4	+	Common cis-acting
AlLAC5	CAAT-box	CAAAT	163	5	-	Common cis-acting
AlLAC5	CAAT-box	CAAAT	204	5	-	Common cis-acting
AlLAC5	CAAT-box	CAAT	358	4	+	Common cis-acting
AlLAC5	CAAT-box	CAAAT	392	5	-	Common cis-acting
AlLAC5	CAAT-box	CAAT	410	4	-	Common cis-acting
AlLAC5	CAAT-box	CAAT	437	4	+	Common cis-acting
AlLAC5	CAAT-box	CAAT	439	4	-	Common cis-acting
AlLAC5	CAAT-box	CAAT	479	4	-	Common cis-acting
AlLAC5	CAAT-box	CAAAT	522	5	+	Common cis-acting
AlLAC5	CAAT-box	CAAT	571	4	-	Common cis-acting
AlLAC5	CAAT-box	CAAT	647	4	-	Common cis-acting
AlLAC5	CAAT-box	CCAAT	674	5	-	Common cis-acting
AlLAC5	CAAT-box	CAAAT	719	5	-	Common cis-acting
AlLAC5	CAAT-box	CAAAT	848	5	+	Common cis-acting
AlLAC5	CAAT-box	CAAT	982	4	+	Common cis-acting
AlLAC5	CAAT-box	CAAT	986	4	+	Common cis-acting
AlLAC5	TGACG-motif	TGACG	534	5	+	Phytohromen
AlLAC5	TGACG-motif	TGACG	656	5	-	Phytohromen
AlLAC5	TGACG-motif	TGACG	755	5	-	Phytohromen
AlLAC5	TATA-box	TATACA	207	6	-	Common cis-acting
AlLAC5	TATA-box	TATA	209	4	+	Common cis-acting
AlLAC5	TATA-box	TATATA	926	6	-	Common cis-acting
AlLAC5	TATA-box	ATATAT	927	6	-	Common cis-acting
AlLAC5	TATA-box	TATATA	928	6	-	Common cis-acting
AlLAC5	TATA-box	TATA	930	4	-	Common cis-acting
AlLAC5	AT~TATA-box	TATATA	926	6	-	Common cis-acting
AlLAC5	AT~TATA-box	TATATA	928	6	-	Common cis-acting
AlLAC5	MYC	CAATTG	437	6	+	TF-binding site
AlLAC5	Unnamed__4	CTCC	50	4	+	Unknown function
AlLAC5	Unnamed__4	CTCC	93	4	-	Unknown function
AlLAC5	Unnamed__4	CTCC	146	4	+	Unknown function
AlLAC5	Unnamed__4	CTCC	167	4	-	Unknown function
AlLAC5	Unnamed__4	CTCC	339	4	-	Unknown function
AlLAC5	Unnamed__4	CTCC	447	4	-	Unknown function
AlLAC5	Unnamed__4	CTCC	837	4	+	Unknown function
AlLAC5	Unnamed__4	CTCC	893	4	+	Unknown function
AlLAC5	Unnamed__4	CTCC	909	4	+	Unknown function
AlLAC5		motif_sequence	137	4	+	Unknown function
AlLAC5		motif_sequence	167	4	-	Unknown function
AlLAC5		motif_sequence	192	4	+	Unknown function
AlLAC5		motif_sequence	342	4	-	Unknown function
AlLAC5		motif_sequence	353	4	+	Unknown function
AlLAC5		motif_sequence	558	4	+	Unknown function
AlLAC5		motif_sequence	863	4	+	Unknown function
AlLAC5	ARE	AAACCA	970	6	+	Stress-related
AlLAC16.2	Unnamed__8	TCCACGTAGA	79	9	+	Unknown function
AlLAC16.2	Unnamed__14	TCCACGTAGA	79	9	+	Unknown function
AlLAC16.2		motif_sequence	47	4	+	Unknown function
AlLAC16.2	Unnamed__12	TCCACGTAGA	79	9	+	Unknown function
AlLAC16.2	Unnamed__4	CTCC	18	4	+	Unknown function
AlLAC16.2	Unnamed__4	CTCC	31	4	+	Unknown function
AlLAC16.2	Unnamed__4	CTCC	78	4	+	Unknown function
AlLAC16.2	Unnamed__4	CTCC	109	4	+	Unknown function
AlLAC16.2	Unnamed__4	CTCC	231	4	-	Unknown function
AlLAC16.2	Unnamed__10	TCCACGTAGA	79	9	+	Unknown function
AlLAC16.2	CARE	CAACTCAC	144	8	+	Phytohromen
AlLAC16.2	GC-motif	CCCCCG	33	6	+	Stress-related
AlLAC16.2	Unnamed__2	CCCCGG	20	6	+	Unknown function
AlLAC16.2	Unnamed__2	CCCCGG	54	6	+	Unknown function
AlLAC16.2	TGACG-motif	TGACG	5	5	-	Phytohromen
AlLAC16.2	CGTCA-motif	CGTCA	5	5	+	Phytohromen
AlLAC16.2	as-1	TGACG	5	5	-	TF-binding site
AlLAC16.1	CGTCA-motif	CGTCA	756	5	-	Phytohromen
AlLAC16.1	as-1	TGACG	756	5	+	TF-binding site
AlLAC16.1	MYB-like sequence	TAACCA	616	6	+	TF-binding site
AlLAC16.1	Myb	CAACTG	257	6	+	TF-binding site
AlLAC16.1	Myb	CAACTG	537	6	-	TF-binding site
AlLAC16.1	WRE3	CCACCT	584	6	+	Stress-related
AlLAC16.1	LTR	CCGAAA	444	6	-	Stress-related
AlLAC16.1	TCA-element	TCAGAAGAGG	961	9	+	Phytohromen
AlLAC16.1	TGACG-motif	TGACG	756	5	+	Phytohromen
AlLAC16.1	3-AF3 binding site	CACTATCTAAC	609	10	+	TF-binding site
AlLAC16.1	CAAT-box	CCAAT	15	5	+	Common cis-acting
AlLAC16.1	CAAT-box	CAAT	16	4	+	Common cis-acting
AlLAC16.1	CAAT-box	CAAT	43	4	+	Common cis-acting
AlLAC16.1	CAAT-box	CAAAT	88	5	-	Common cis-acting
AlLAC16.1	CAAT-box	CAAT	158	4	+	Common cis-acting
AlLAC16.1	CAAT-box	CAAT	233	4	+	Common cis-acting
AlLAC16.1	CAAT-box	CAAT	297	4	+	Common cis-acting
AlLAC16.1	CAAT-box	CAAAT	320	5	-	Common cis-acting
AlLAC16.1	CAAT-box	CAAT	352	4	-	Common cis-acting
AlLAC16.1	CAAT-box	TGCCAAC	499	7	+	Common cis-acting
AlLAC16.1	CAAT-box	CAAT	674	4	+	Common cis-acting
AlLAC16.1	CAAT-box	CCAAT	693	5	+	Common cis-acting
AlLAC16.1	CAAT-box	CAAT	694	4	+	Common cis-acting
AlLAC16.1	CAAT-box	CAAT	805	4	-	Common cis-acting
AlLAC16.1	CAAT-box	CAAAT	815	5	+	Common cis-acting
AlLAC16.1	CAAT-box	CAAT	940	4	+	Common cis-acting
AlLAC16.1	TATA-box	taTATAAAtc	25	9	-	Common cis-acting
AlLAC16.1	TATA-box	TATACA	27	6	-	Common cis-acting
AlLAC16.1	TATA-box	TATATA	29	6	+	Common cis-acting
AlLAC16.1	TATA-box	ATATAT	30	6	+	Common cis-acting
AlLAC16.1	TATA-box	TATA	31	4	+	Common cis-acting
AlLAC16.1	TATA-box	TACAAAA	677	7	+	Common cis-acting
AlLAC16.1	G-box	CACGAC	746	6	+	Light responsiveness
AlLAC16.1	G-box	CACGTC	827	6	+	Light responsiveness
AlLAC16.1	AT~TATA-box	TATATA	29	6	+	Common cis-acting
AlLAC16.1	WUN-motif	ACATTACGG	139	9	+	Stress-related
AlLAC16.1		motif_sequence	80	4	-	Unknown function
AlLAC16.1		motif_sequence	186	4	-	Unknown function
AlLAC16.1		motif_sequence	276	4	+	Unknown function
AlLAC16.1		motif_sequence	282	4	+	Unknown function
AlLAC16.1		motif_sequence	309	4	+	Unknown function
AlLAC16.1		motif_sequence	412	4	-	Unknown function
AlLAC16.1		motif_sequence	575	4	-	Unknown function
AlLAC16.1		motif_sequence	689	4	+	Unknown function
AlLAC16.1		motif_sequence	964	4	-	Unknown function
AlLAC16.1	Unnamed__4	CTCC	263	4	+	Unknown function
AlLAC16.1	Unnamed__4	CTCC	397	4	-	Unknown function
AlLAC16.1	Unnamed__4	CTCC	419	4	+	Unknown function
AlLAC16.1	Unnamed__4	CTCC	448	4	-	Unknown function
AlLAC16.1	Unnamed__4	CTCC	582	4	+	Unknown function
AlLAC16.1	Unnamed__4	CTCC	649	4	-	Unknown function
AlLAC16.1	Unnamed__4	CTCC	691	4	+	Unknown function
AlLAC16.1	Unnamed__4	CTCC	902	4	-	Unknown function
AlLAC16.1	Unnamed__4	CTCC	946	4	+	Unknown function
AlLAC16.1	ABRE	ACGTG	97	5	+	Phytohromen
AlLAC16.1	ABRE	GCAACGTGTC	749	9	-	Phytohromen
AlLAC16.1	ABRE	ACGTG	751	5	-	Phytohromen
AlLAC16.1	ABRE	ACGTG	827	5	-	Phytohromen
AlLAC16.1	MBS	CAACTG	257	6	+	Stress-related
AlLAC16.1	MBS	CAACTG	537	6	-	Stress-related
AlLAC16.1	G-Box	CACGTT	96	6	-	Light responsiveness
AlLAC16.1	G-Box	CACGTT	751	6	+	Light responsiveness
AlLAC16.1	STRE	AGGGG	178	5	-	Stress-related
AlLAC16.1	STRE	AGGGG	364	5	+	Stress-related
AlLAC16.1	STRE	AGGGG	899	5	+	Stress-related
AlLAC16.1	TGA-element	AACGAC	760	6	-	Phytohromen
AlLAC16.1	MYB	TAACCA	616	6	+	TF-binding site
AlLAC16.1	Unnamed__1	CGTGG	204	5	+	Unknown function
AlLAC6	GC-motif	CCCCCG	726	6	+	Stress-related
AlLAC6	CCGTCC motif	CCGTCC	744	6	+	Unknown function
AlLAC6	ABRE	CACGTG	15	6	+	Phytohromen
AlLAC6	ABRE	ACGTG	16	5	+	Phytohromen
AlLAC6	ABRE	TACGGTC	213	7	-	Phytohromen
AlLAC6	W box	TTGACC	211	6	+	TF-binding site
AlLAC6	CAT-box	GCCACT	256	6	-	Tissue-specific
AlLAC6	CAT-box	GCCACT	943	6	+	Tissue-specific
AlLAC6	Unnamed__1	CGTGG	759	5	-	Unknown function
AlLAC6	MYB	CAACCA	782	6	+	TF-binding site
AlLAC6	TGA-element	AACGAC	550	6	+	Phytohromen
AlLAC6	STRE	AGGGG	581	5	-	Stress-related
AlLAC6	STRE	AGGGG	639	5	-	Stress-related
AlLAC6	G-Box	CACGTG	15	6	+	Light responsiveness
AlLAC6	AC-I	(T/C)C(T/C)(C/T)ACC(T/C)ACC	73	9	+	Unknown function
AlLAC6	CAAT-box	CCAAT	58	5	+	Common cis-acting
AlLAC6	CAAT-box	CAAT	59	4	+	Common cis-acting
AlLAC6	CAAT-box	CAAT	89	4	+	Common cis-acting
AlLAC6	CAAT-box	CAAT	278	4	+	Common cis-acting
AlLAC6	CAAT-box	CAAT	389	4	-	Common cis-acting
AlLAC6	CAAT-box	CAAAT	393	5	-	Common cis-acting
AlLAC6	CAAT-box	CAAT	409	4	-	Common cis-acting
AlLAC6	CAAT-box	CAAT	430	4	-	Common cis-acting
AlLAC6	CAAT-box	CAAAT	624	5	+	Common cis-acting
AlLAC6	CAAT-box	CCAAT	785	5	+	Common cis-acting
AlLAC6	CAAT-box	CAAT	786	4	+	Common cis-acting
AlLAC6	TGACG-motif	TGACG	604	5	-	Phytohromen
AlLAC6	TATC-box	TATCCCA	686	7	+	Phytohromen
AlLAC6	as-1	TGACG	604	5	-	TF-binding site
AlLAC6	TATA	TATAAAAT	236	8	-	Common cis-acting
AlLAC6	CCGTCC-box	CCGTCC	744	6	+	Unknown function
AlLAC6	TCT-motif	TCTTAC	515	6	+	Light responsiveness
AlLAC6	CGTCA-motif	CGTCA	604	5	+	Phytohromen
AlLAC6	Unnamed__4	CTCC	54	4	-	Unknown function
AlLAC6	Unnamed__4	CTCC	324	4	+	Unknown function
AlLAC6	Unnamed__4	CTCC	509	4	+	Unknown function
AlLAC6	Unnamed__4	CTCC	642	4	+	Unknown function
AlLAC6	Unnamed__4	CTCC	859	4	+	Unknown function
AlLAC6	Unnamed__4	CTCC	962	4	+	Unknown function
AlLAC6		motif_sequence	174	4	+	Unknown function
AlLAC6		motif_sequence	232	4	-	Unknown function
AlLAC6		motif_sequence	383	4	-	Unknown function
AlLAC6		motif_sequence	426	4	-	Unknown function
AlLAC6		motif_sequence	829	4	+	Unknown function
AlLAC6		motif_sequence	854	4	+	Unknown function
AlLAC6		motif_sequence	951	4	+	Unknown function
AlLAC6	I-box	cGATAAGGCG	485	9	-	Light responsiveness
AlLAC6	A-box	CCGTCC	744	6	+	Common cis-acting
AlLAC6	MYC	CATGTG	173	6	+	TF-binding site
AlLAC6	G-box	CACGTG	15	6	+	Light responsiveness
AlLAC6	TATA-box	TATAAAA	237	7	-	Common cis-acting
AlLAC6	TATA-box	TATAAA	238	6	-	Common cis-acting
AlLAC6	TATA-box	TATAA	239	5	-	Common cis-acting
AlLAC6	TATA-box	TATA	240	4	+	Common cis-acting
AlLAC17.3	CAAT-box	CCAAT	24	5	+	Common cis-acting
AlLAC17.3	CAAT-box	CAAT	25	4	+	Common cis-acting
AlLAC17.3	CAAT-box	CCAAT	113	5	-	Common cis-acting
AlLAC17.3	CAAT-box	CAAT	377	4	-	Common cis-acting
AlLAC17.3	CAAT-box	CAAT	392	4	+	Common cis-acting
AlLAC17.3	CAAT-box	CAAAT	406	5	+	Common cis-acting
AlLAC17.3	CAAT-box	CAAT	533	4	-	Common cis-acting
AlLAC17.3	CAAT-box	CAAAT	546	5	+	Common cis-acting
AlLAC17.3	CAAT-box	CAAAT	589	5	-	Common cis-acting
AlLAC17.3	CAAT-box	CAAT	652	4	+	Common cis-acting
AlLAC17.3	CAAT-box	CAAT	858	4	-	Common cis-acting
AlLAC17.3	CAAT-box	CAAT	968	4	-	Common cis-acting
AlLAC17.3	CAAT-box	CAAT	976	4	+	Common cis-acting
AlLAC17.3	CAAT-box	CAAT	978	4	-	Common cis-acting
AlLAC17.3	TGACG-motif	TGACG	187	5	-	Phytohromen
AlLAC17.3	TGACG-motif	TGACG	287	5	-	Phytohromen
AlLAC17.3	TGACG-motif	TGACG	457	5	-	Phytohromen
AlLAC17.3	TGACG-motif	TGACG	779	5	-	Phytohromen
AlLAC17.3	GT1-motif	GGTTAA	327	6	-	Light responsiveness
AlLAC17.3	OCT	CGCGGATC	348	8	-	Growth and development
AlLAC17.3	LTR	CCGAAA	368	6	+	Stress-related
AlLAC17.3	WRE3	CCACCT	843	6	+	Stress-related
AlLAC17.3	MYB-like sequence	TAACCA	328	6	+	TF-binding site
AlLAC17.3	TCCC-motif	TCTCCCT	993	7	-	Light responsiveness
AlLAC17.3	W box	TTGACC	165	6	+	TF-binding site
AlLAC17.3	as-1	TGACG	187	5	-	TF-binding site
AlLAC17.3	as-1	TGACG	287	5	-	TF-binding site
AlLAC17.3	as-1	TGACG	457	5	-	TF-binding site
AlLAC17.3	as-1	TGACG	779	5	-	TF-binding site
AlLAC17.3	CGTCA-motif	CGTCA	187	5	+	Phytohromen
AlLAC17.3	CGTCA-motif	CGTCA	287	5	+	Phytohromen
AlLAC17.3	CGTCA-motif	CGTCA	457	5	+	Phytohromen
AlLAC17.3	CGTCA-motif	CGTCA	779	5	+	Phytohromen
AlLAC17.3	Unnamed__4	CTCC	21	4	+	Unknown function
AlLAC17.3	Unnamed__4	CTCC	116	4	-	Unknown function
AlLAC17.3	Unnamed__4	CTCC	470	4	+	Unknown function
AlLAC17.3	Unnamed__4	CTCC	763	4	+	Unknown function
AlLAC17.3	Unnamed__4	CTCC	794	4	+	Unknown function
AlLAC17.3	Unnamed__4	CTCC	955	4	+	Unknown function
AlLAC17.3	Unnamed__4	CTCC	995	4	-	Unknown function
AlLAC17.3		motif_sequence	90	4	+	Unknown function
AlLAC17.3		motif_sequence	116	4	-	Unknown function
AlLAC17.3		motif_sequence	197	4	+	Unknown function
AlLAC17.3		motif_sequence	276	4	+	Unknown function
AlLAC17.3		motif_sequence	437	4	-	Unknown function
AlLAC17.3		motif_sequence	699	4	-	Unknown function
AlLAC17.3		motif_sequence	877	4	+	Unknown function
AlLAC17.3		motif_sequence	922	4	+	Unknown function
AlLAC17.3		motif_sequence	959	4	+	Unknown function
AlLAC17.3	AT~TATA-box	TATATA	569	6	-	Common cis-acting
AlLAC17.3	AT~TATA-box	TATATA	887	6	-	Common cis-acting
AlLAC17.3	Unnamed__1	CGTGG	317	5	+	Unknown function
AlLAC17.3	Unnamed__1	CGTGG	927	5	+	Unknown function
AlLAC17.3	MYB	CAACCA	37	6	-	TF-binding site
AlLAC17.3	MYB	TAACCA	328	6	+	TF-binding site
AlLAC17.3	MYB	CAACCA	862	6	+	TF-binding site
AlLAC17.3	MYC	CATTTG	588	6	+	TF-binding site
AlLAC17.3	MYC	CAATTG	976	6	-	TF-binding site
AlLAC17.3	STRE	AGGGG	765	5	-	Stress-related
AlLAC17.3	STRE	AGGGG	808	5	-	Stress-related
AlLAC17.3	CARE	CAACTCCC	18	8	+	Phytohromen
AlLAC17.3	TATA-box	TATA	137	4	+	Common cis-acting
AlLAC17.3	TATA-box	TATAA	269	5	-	Common cis-acting
AlLAC17.3	TATA-box	TATA	270	4	+	Common cis-acting
AlLAC17.3	TATA-box	ATATAT	568	6	-	Common cis-acting
AlLAC17.3	TATA-box	TATATA	569	6	-	Common cis-acting
AlLAC17.3	TATA-box	ATATAT	570	6	-	Common cis-acting
AlLAC17.3	TATA-box	TATA	571	4	-	Common cis-acting
AlLAC17.3	TATA-box	ATTATA	613	6	+	Common cis-acting
AlLAC17.3	TATA-box	TATAA	614	5	-	Common cis-acting
AlLAC17.3	TATA-box	TATA	615	4	-	Common cis-acting
AlLAC17.3	TATA-box	TACAAAA	695	7	-	Common cis-acting
AlLAC17.3	TATA-box	TACAAAA	848	7	+	Common cis-acting
AlLAC17.3	TATA-box	TATATA	887	6	-	Common cis-acting
AlLAC17.3	TATA-box	ATATAA	888	6	+	Common cis-acting
AlLAC17.3	TATA-box	TATA	889	4	-	Common cis-acting
AlLAC14	CGTCA-motif	CGTCA	348	5	-	Phytohromen
AlLAC14	as-1	TGACG	348	5	+	TF-binding site
AlLAC14	ABRE	ACGTG	148	5	-	Phytohromen
AlLAC14	ABRE	ACGTG	591	5	+	Phytohromen
AlLAC14	ABRE	ACGTG	896	5	-	Phytohromen
AlLAC14	Myb	TAACTG	408	6	-	TF-binding site
AlLAC14	LTR	CCGAAA	723	6	+	Stress-related
AlLAC14	GT1-motif	GGTTAA	383	6	-	Light responsiveness
AlLAC14	TGACG-motif	TGACG	348	5	+	Phytohromen
AlLAC14	CAAT-box	CAAAT	74	5	-	Common cis-acting
AlLAC14	CAAT-box	CAAT	85	4	+	Common cis-acting
AlLAC14	CAAT-box	CAAAT	109	5	-	Common cis-acting
AlLAC14	CAAT-box	CAAAT	180	5	+	Common cis-acting
AlLAC14	CAAT-box	CAAT	183	4	-	Common cis-acting
AlLAC14	CAAT-box	CCAAT	217	5	+	Common cis-acting
AlLAC14	CAAT-box	CAAT	218	4	+	Common cis-acting
AlLAC14	CAAT-box	CAAT	222	4	+	Common cis-acting
AlLAC14	CAAT-box	CAAT	346	4	-	Common cis-acting
AlLAC14	CAAT-box	CCAAT	502	5	+	Common cis-acting
AlLAC14	CAAT-box	CAAT	503	4	+	Common cis-acting
AlLAC14	CAAT-box	CAAAT	627	5	+	Common cis-acting
AlLAC14	CAAT-box	CAAT	858	4	-	Common cis-acting
AlLAC14	CAAT-box	CAAAT	903	5	+	Common cis-acting
AlLAC14	CAAT-box	CAAAT	906	5	-	Common cis-acting
AlLAC14	TATA-box	TATA	13	4	+	Common cis-acting
AlLAC14	TATA-box	ATATAA	65	6	+	Common cis-acting
AlLAC14	TATA-box	TATA	66	4	+	Common cis-acting
AlLAC14	TATA-box	TATACA	283	6	-	Common cis-acting
AlLAC14	TATA-box	TATA	285	4	+	Common cis-acting
AlLAC14	TATA-box	TATAA	742	5	-	Common cis-acting
AlLAC14	TATA-box	TATA	743	4	-	Common cis-acting
AlLAC14	TATA-box	TATA	785	4	-	Common cis-acting
AlLAC14	G-box	CACGAC	401	6	-	Light responsiveness
AlLAC14	G-box	TAAACGTG	588	8	+	Light responsiveness
AlLAC14	G-Box	CACGTT	148	6	+	Light responsiveness
AlLAC14	G-Box	CACGTT	590	6	-	Light responsiveness
AlLAC14	G-Box	CACGTT	896	6	+	Light responsiveness
AlLAC14	CARE	CAACTCAC	507	8	+	Phytohromen
AlLAC14	TGA-element	AACGAC	733	6	-	Phytohromen
AlLAC14	STRE	AGGGG	354	5	-	Stress-related
AlLAC14	STRE	AGGGG	793	5	-	Stress-related
AlLAC14	STRE	AGGGG	930	5	+	Stress-related
AlLAC14	STRE	AGGGG	950	5	-	Stress-related
AlLAC14	MYC	CATGTG	115	6	+	TF-binding site
AlLAC14	MYC	CATGTG	651	6	-	TF-binding site
AlLAC14	Unnamed__1	CGTGG	147	5	-	Unknown function
AlLAC14	Unnamed__1	CGTGG	308	5	-	Unknown function
AlLAC14	Unnamed__1	CGTGG	435	5	+	Unknown function
AlLAC14	Unnamed__1	CGTGG	592	5	+	Unknown function
AlLAC14	Unnamed__1	CGTGG	657	5	+	Unknown function
AlLAC14	Unnamed_1	GGATTTTACAGT	72	11	+	Phytohromen
AlLAC14	I-box	gGATAAGGTG	148	9	-	Light responsiveness
AlLAC14		motif_sequence	19	4	-	Unknown function
AlLAC14		motif_sequence	542	4	-	Unknown function
AlLAC14		motif_sequence	650	4	-	Unknown function
AlLAC14		motif_sequence	660	4	-	Unknown function
AlLAC14		motif_sequence	924	4	-	Unknown function
AlLAC14		motif_sequence	946	4	+	Unknown function
AlLAC14	Unnamed__4	CTCC	306	4	+	Unknown function
AlLAC14	Unnamed__4	CTCC	566	4	-	Unknown function
AlLAC14	Unnamed__4	CTCC	933	4	-	Unknown function
AlLAC14	Unnamed__4	CTCC	948	4	+	Unknown function
AlLAC7.2	AT~ABRE	TACGTGTC	69	8	-	Phytohromen
AlLAC7.2	CCGTCC motif	CCGTCC	759	6	+	Unknown function
AlLAC7.2	F-box	CTATTCTCATT	674	10	-	Stress-related
AlLAC7.2	ACE	GACACGTATG	69	9	+	Light responsiveness
AlLAC7.2	ABRE	TACGTGTC	69	8	-	Phytohromen
AlLAC7.2	ABRE	ACGTG	71	5	-	Phytohromen
AlLAC7.2	ABRE	ACGTG	293	5	+	Phytohromen
AlLAC7.2	ABRE	GCCGCGTGGC	301	9	+	Phytohromen
AlLAC7.2	ABRE	ACGTG	693	5	-	Phytohromen
AlLAC7.2	Myb-binding site	CAACAG	24	6	-	TF-binding site
AlLAC7.2	TGA-element	AACGAC	254	6	+	Phytohromen
AlLAC7.2	STRE	AGGGG	186	5	-	Stress-related
AlLAC7.2	MYB	CAACAG	24	6	-	TF-binding site
AlLAC7.2	ABRE4	CACGTA	71	6	+	Phytohromen
AlLAC7.2	plant_AP-2-like	CGACCAGG	188	8	-	TF-binding site
AlLAC7.2	ERE	ATTTTAAA	604	8	+	Phytohromen
AlLAC7.2	CCAAT-box	CAACGG	858	6	+	TF-binding site
AlLAC7.2	ABRE3a	TACGTG	71	6	-	Phytohromen
AlLAC7.2	G-Box	CACGTT	292	6	-	Light responsiveness
AlLAC7.2	G-Box	CACGTT	693	6	+	Light responsiveness
AlLAC7.2	WRE3	CCACCT	871	6	+	Stress-related
AlLAC7.2	GT1-motif	GTGTGTGAA	660	9	+	Light responsiveness
AlLAC7.2	TCA-element	CCATCTTTTT	495	9	-	Phytohromen
AlLAC7.2	TCA-element	TCAGAAGAGG	709	9	-	Phytohromen
AlLAC7.2	TGACG-motif	TGACG	781	5	+	Phytohromen
AlLAC7.2	TC-rich repeats	GTTTTCTTAC	845	9	+	Stress-related
AlLAC7.2	CAAT-box	CAAT	43	4	+	Common cis-acting
AlLAC7.2	CAAT-box	CAAT	212	4	-	Common cis-acting
AlLAC7.2	CAAT-box	CAAT	310	4	+	Common cis-acting
AlLAC7.2	CAAT-box	CAAT	371	4	-	Common cis-acting
AlLAC7.2	CAAT-box	CAAT	395	4	+	Common cis-acting
AlLAC7.2	CAAT-box	CAAAT	421	5	+	Common cis-acting
AlLAC7.2	CAAT-box	CAAT	445	4	+	Common cis-acting
AlLAC7.2	CAAT-box	CAAT	490	4	-	Common cis-acting
AlLAC7.2	CAAT-box	CAAT	554	4	+	Common cis-acting
AlLAC7.2	CAAT-box	CAAAT	574	5	+	Common cis-acting
AlLAC7.2	CAAT-box	CAAT	577	4	-	Common cis-acting
AlLAC7.2	CAAT-box	CAAT	647	4	-	Common cis-acting
AlLAC7.2	CAAT-box	CAAAT	727	5	+	Common cis-acting
AlLAC7.2	CAAT-box	CAAT	773	4	+	Common cis-acting
AlLAC7.2	CAAT-box	CAAAT	819	5	+	Common cis-acting
AlLAC7.2	CAAT-box	CAAAT	827	5	-	Common cis-acting
AlLAC7.2	CGTCA-motif	CGTCA	781	5	-	Phytohromen
AlLAC7.2	MRE	AACCTAA	640	7	+	TF-binding site
AlLAC7.2	TCT-motif	TCTTAC	849	6	+	Light responsiveness
AlLAC7.2	CCGTCC-box	CCGTCC	759	6	+	Unknown function
AlLAC7.2	as-1	TGACG	781	5	+	TF-binding site
AlLAC7.2	MYC	CATTTG	826	6	+	TF-binding site
AlLAC7.2	A-box	CCGTCC	759	6	+	Common cis-acting
AlLAC7.2	Sp1	GGGCGG	183	6	-	Light responsiveness
AlLAC7.2	AT~TATA-box	TATATA	240	6	+	Common cis-acting
AlLAC7.2	AT~TATA-box	TATATA	886	6	-	Common cis-acting
AlLAC7.2	AT~TATA-box	TATATA	888	6	-	Common cis-acting
AlLAC7.2	ARE	AAACCA	339	6	-	Stress-related
AlLAC7.2		motif_sequence	38	4	+	Unknown function
AlLAC7.2		motif_sequence	198	4	+	Unknown function
AlLAC7.2		motif_sequence	374	4	-	Unknown function
AlLAC7.2		motif_sequence	390	4	+	Unknown function
AlLAC7.2		motif_sequence	596	4	-	Unknown function
AlLAC7.2		motif_sequence	910	4	-	Unknown function
AlLAC7.2		motif_sequence	948	4	-	Unknown function
AlLAC7.2		motif_sequence	956	4	-	Unknown function
AlLAC7.2	Unnamed__4	CTCC	181	4	+	Unknown function
AlLAC7.2	TATA-box	TATATA	240	6	+	Common cis-acting
AlLAC7.2	TATA-box	ATATAT	241	6	+	Common cis-acting
AlLAC7.2	TATA-box	TATA	242	4	+	Common cis-acting
AlLAC7.2	TATA-box	TATA	367	4	+	Common cis-acting
AlLAC7.2	TATA-box	ATATAT	474	6	+	Common cis-acting
AlLAC7.2	TATA-box	TATA	475	4	+	Common cis-acting
AlLAC7.2	TATA-box	TATA	521	4	-	Common cis-acting
AlLAC7.2	TATA-box	ATATAT	600	6	-	Common cis-acting
AlLAC7.2	TATA-box	TATA	601	4	-	Common cis-acting
AlLAC7.2	TATA-box	TATTTAAA	606	8	-	Common cis-acting
AlLAC7.2	TATA-box	TATATA	886	6	-	Common cis-acting
AlLAC7.2	TATA-box	ATATAT	887	6	-	Common cis-acting
AlLAC7.2	TATA-box	TATATA	888	6	-	Common cis-acting
AlLAC7.2	TATA-box	ATATAA	889	6	+	Common cis-acting
AlLAC7.2	TATA-box	TATA	890	4	-	Common cis-acting
AlLAC7.2	TATA-box	TATA	996	4	-	Common cis-acting
AlLAC7.2	G-box	TACGTG	71	6	-	Light responsiveness
AlLAC7.2	MYB recognition site	CCGTTG	858	6	-	TF-binding site
AlLAC7.2	ATCT-motif	AATCTAATCC	418	9	+	Light responsiveness
AlLAC7.1	ABRE	ACGTG	288	5	-	Phytohromen
AlLAC7.1	ABRE	ACGTG	486	5	+	Phytohromen
AlLAC7.1	W box	TTGACC	303	6	-	TF-binding site
AlLAC7.1	Myb-binding site	CAACAG	217	6	+	TF-binding site
AlLAC7.1	RY-element	CATGCATG	293	8	+	Tissue-specific
AlLAC7.1	G-Box	CACGTT	485	6	-	Light responsiveness
AlLAC7.1	ERE	ATTTTAAA	240	8	-	Phytohromen
AlLAC7.1	MYB	CAACAG	217	6	+	TF-binding site
AlLAC7.1	TGA-element	AACGAC	337	6	-	Phytohromen
AlLAC7.1	as-1	TGACG	204	5	-	TF-binding site
AlLAC7.1	as-1	TGACG	290	5	-	TF-binding site
AlLAC7.1	CGTCA-motif	CGTCA	204	5	+	Phytohromen
AlLAC7.1	CGTCA-motif	CGTCA	290	5	+	Phytohromen
AlLAC7.1	TGACG-motif	TGACG	204	5	-	Phytohromen
AlLAC7.1	TGACG-motif	TGACG	290	5	-	Phytohromen
AlLAC7.1	GT1-motif	GTGTGTGAA	121	9	+	Light responsiveness
AlLAC7.1	CAAT-box	CCAAT	7	5	-	Common cis-acting
AlLAC7.1	CAAT-box	CAAT	81	4	-	Common cis-acting
AlLAC7.1	CAAT-box	CAAT	207	4	+	Common cis-acting
AlLAC7.1	CAAT-box	CAAT	389	4	-	Common cis-acting
AlLAC7.1	CAAT-box	CAAT	398	4	+	Common cis-acting
AlLAC7.1	CAAT-box	CAAT	400	4	-	Common cis-acting
AlLAC7.1	CAAT-box	CAAAT	542	5	-	Common cis-acting
AlLAC7.1	CAAT-box	CAAAT	553	5	-	Common cis-acting
AlLAC7.1	CAAT-box	CAAT	584	4	-	Common cis-acting
AlLAC7.1	CAAT-box	CAAAT	643	5	+	Common cis-acting
AlLAC7.1	CAAT-box	CAAT	649	4	-	Common cis-acting
AlLAC7.1	CAAT-box	CAAT	683	4	-	Common cis-acting
AlLAC7.1	CAAT-box	CAAT	687	4	+	Common cis-acting
AlLAC7.1	CAAT-box	CAAT	689	4	-	Common cis-acting
AlLAC7.1	ATCT-motif	AATCTAATCC	167	9	+	Light responsiveness
AlLAC7.1	TATA-box	TATAA	92	5	-	Common cis-acting
AlLAC7.1	TATA-box	TATA	93	4	+	Common cis-acting
AlLAC7.1	TATA-box	TATA	261	4	+	Common cis-acting
AlLAC7.1	TATA-box	TATA	496	4	-	Common cis-acting
AlLAC7.1	TATA-box	TATAA	506	5	-	Common cis-acting
AlLAC7.1	TATA-box	TATA	507	4	-	Common cis-acting
AlLAC7.1	TATA-box	TATA	532	4	-	Common cis-acting
AlLAC7.1	G-box	CACGTC	288	6	+	Light responsiveness
AlLAC7.1	ARE	AAACCA	237	6	-	Stress-related
AlLAC7.1	Unnamed__10	TCCACGTAGA	448	9	+	Unknown function
AlLAC7.1	GTGGC-motif	CATCGTGTGGC	484	10	+	Light responsiveness
AlLAC7.1	Unnamed__12	TCCACGTAGA	448	9	+	Unknown function
AlLAC7.1	Unnamed__4	CTCC	11	4	-	Unknown function
AlLAC7.1	Unnamed__4	CTCC	429	4	-	Unknown function
AlLAC7.1		motif_sequence	355	4	-	Unknown function
AlLAC7.1		motif_sequence	432	4	-	Unknown function
AlLAC7.1	MYC	CAATTG	398	6	-	TF-binding site
AlLAC7.1	MYC	CATGTG	442	6	+	TF-binding site
AlLAC7.1	MYC	CATTTG	541	6	+	TF-binding site
AlLAC7.1	MYC	CATTTG	552	6	+	TF-binding site
AlLAC7.1	MYC	CATGTG	597	6	+	TF-binding site
AlLAC7.1	MYC	CAATTG	687	6	-	TF-binding site
AlLAC7.1	Unnamed__14	TCCACGTAGA	448	9	+	Unknown function
AlLAC7.1	Unnamed__8	TCCACGTAGA	448	9	+	Unknown function
AlLAC7.3	Myb-binding site	CAACAG	498	6	-	TF-binding site
AlLAC7.3	ABRE	ACGTG	549	5	+	Phytohromen
AlLAC7.3	GARE-motif	TCTGTTG	497	7	+	Phytohromen
AlLAC7.3	W box	TTGACC	344	6	+	TF-binding site
AlLAC7.3	DRE1	ACCGAGA	369	7	+	Stress-related
AlLAC7.3	DRE core	GCCGAC	545	6	+	Stress-related
AlLAC7.3	Box 4	ATTAAT	667	6	-	Light responsiveness
AlLAC7.3	Unnamed__1	CGTGG	920	5	-	Unknown function
AlLAC7.3	MYB	CAACCA	382	6	-	TF-binding site
AlLAC7.3	MYB	TAACCA	386	6	-	TF-binding site
AlLAC7.3	MYB	TAACCA	465	6	+	TF-binding site
AlLAC7.3	MYB	CAACAG	498	6	-	TF-binding site
AlLAC7.3	GATA-motif	GATAGGA	796	7	-	Light responsiveness
AlLAC7.3	TGA-element	AACGAC	356	6	-	Phytohromen
AlLAC7.3	TCCC-motif	TCTCCCT	435	7	+	Light responsiveness
AlLAC7.3	as-1	TGACG	481	5	-	TF-binding site
AlLAC7.3	CGTCA-motif	CGTCA	481	5	+	Phytohromen
AlLAC7.3	CAAT-box	CAAAT	19	5	-	Common cis-acting
AlLAC7.3	CAAT-box	CCAAT	178	5	+	Common cis-acting
AlLAC7.3	CAAT-box	CAAT	179	4	+	Common cis-acting
AlLAC7.3	CAAT-box	TGCCAAC	219	7	-	Common cis-acting
AlLAC7.3	CAAT-box	CAAT	228	4	-	Common cis-acting
AlLAC7.3	CAAT-box	CAAT	250	4	-	Common cis-acting
AlLAC7.3	CAAT-box	CAAAT	431	5	+	Common cis-acting
AlLAC7.3	CAAT-box	CAAT	443	4	-	Common cis-acting
AlLAC7.3	CAAT-box	CAAT	525	4	-	Common cis-acting
AlLAC7.3	CAAT-box	CAAT	542	4	-	Common cis-acting
AlLAC7.3	CAAT-box	CAAAT	569	5	-	Common cis-acting
AlLAC7.3	CAAT-box	CCAAT	582	5	-	Common cis-acting
AlLAC7.3	CAAT-box	CAAT	609	4	+	Common cis-acting
AlLAC7.3	CAAT-box	CAAAT	613	5	+	Common cis-acting
AlLAC7.3	CAAT-box	CAAAT	682	5	-	Common cis-acting
AlLAC7.3	CAAT-box	CAAAT	705	5	-	Common cis-acting
AlLAC7.3	CAAT-box	CCAAT	776	5	-	Common cis-acting
AlLAC7.3	CAAT-box	CAAAT	834	5	-	Common cis-acting
AlLAC7.3	TGACG-motif	TGACG	481	5	-	Phytohromen
AlLAC7.3	3-AF3 binding site	CACTATCTAAC	638	11	-	TF-binding site
AlLAC7.3	GT1-motif	GGTTAA	299	6	+	Light responsiveness
AlLAC7.3	LTR	CCGAAA	825	6	+	Stress-related
AlLAC7.3	LTR	CCGAAA	858	6	+	Stress-related
AlLAC7.3	MYB-like sequence	TAACCA	386	6	-	TF-binding site
AlLAC7.3	MYB-like sequence	TAACCA	465	6	+	TF-binding site
AlLAC7.3	G-box	CACGTC	548	6	-	Light responsiveness
AlLAC7.3	AAGAA-motif	gGTAAAGAAA	340	9	-	Unknown function
AlLAC7.3	TATA-box	ATATAT	113	6	+	Common cis-acting
AlLAC7.3	TATA-box	TATATA	114	6	+	Common cis-acting
AlLAC7.3	TATA-box	TATA	116	4	+	Common cis-acting
AlLAC7.3	TATA-box	TATATA	491	6	+	Common cis-acting
AlLAC7.3	TATA-box	ATATAT	492	6	+	Common cis-acting
AlLAC7.3	TATA-box	TATA	493	4	+	Common cis-acting
AlLAC7.3	TATA-box	TATA	743	4	-	Common cis-acting
AlLAC7.3	TATA-box	TATAAA	754	6	-	Common cis-acting
AlLAC7.3	TATA-box	TATAA	755	5	-	Common cis-acting
AlLAC7.3	TATA-box	TATA	756	4	-	Common cis-acting
AlLAC7.3	TATA-box	TATA	786	4	-	Common cis-acting
AlLAC7.3	TATA-box	TATATA	875	6	-	Common cis-acting
AlLAC7.3	TATA-box	ATATAT	876	6	-	Common cis-acting
AlLAC7.3	TATA-box	TATATA	877	6	-	Common cis-acting
AlLAC7.3	TATA-box	TATA	879	4	-	Common cis-acting
AlLAC7.3	Unnamed__4	CTCC	243	4	-	Unknown function
AlLAC7.3	Unnamed__4	CTCC	411	4	+	Unknown function
AlLAC7.3	Unnamed__4	CTCC	436	4	+	Unknown function
AlLAC7.3	Unnamed__4	CTCC	519	4	+	Unknown function
AlLAC7.3	Unnamed__4	CTCC	709	4	-	Unknown function
AlLAC7.3	Unnamed__4	CTCC	951	4	+	Unknown function
AlLAC7.3	Unnamed__4	CTCC	955	4	+	Unknown function
AlLAC7.3		motif_sequence	167	4	-	Unknown function
AlLAC7.3		motif_sequence	184	4	+	Unknown function
AlLAC7.3		motif_sequence	201	4	+	Unknown function
AlLAC7.3		motif_sequence	246	4	-	Unknown function
AlLAC7.3		motif_sequence	434	4	+	Unknown function
AlLAC7.3		motif_sequence	747	4	-	Unknown function
AlLAC7.3		motif_sequence	944	4	+	Unknown function
AlLAC7.3		motif_sequence	976	4	+	Unknown function
AlLAC7.3	ARE	AAACCA	423	6	-	Stress-related
AlLAC7.3	AT~TATA-box	TATATA	114	6	+	Common cis-acting
AlLAC7.3	AT~TATA-box	TATATA	491	6	+	Common cis-acting
AlLAC7.3	AT~TATA-box	TATATA	875	6	-	Common cis-acting
AlLAC7.3	AT~TATA-box	TATATA	877	6	-	Common cis-acting
AlLAC7.3	MYC	CATGTG	156	6	-	TF-binding site
AlLAC7.3	MYC	CATGTG	158	6	+	TF-binding site
AlLAC7.3	MYC	CATGTG	378	6	+	TF-binding site
AlLAC7.3	MYC	CATTTG	681	6	+	TF-binding site
AlLAC17.1	G-box	CACGTC	787	6	+	Light responsiveness
AlLAC17.1	TATA-box	ATATAT	8	6	+	Common cis-acting
AlLAC17.1	TATA-box	TATA	9	4	+	Common cis-acting
AlLAC17.1	TATA-box	ATATAT	167	6	+	Common cis-acting
AlLAC17.1	TATA-box	TATATA	168	6	+	Common cis-acting
AlLAC17.1	TATA-box	ATATAT	169	6	+	Common cis-acting
AlLAC17.1	TATA-box	TATA	170	4	+	Common cis-acting
AlLAC17.1	TATA-box	TATA	188	4	+	Common cis-acting
AlLAC17.1	TATA-box	TATA	297	4	+	Common cis-acting
AlLAC17.1	TATA-box	TATATA	862	6	-	Common cis-acting
AlLAC17.1	TATA-box	ATATAT	863	6	-	Common cis-acting
AlLAC17.1	TATA-box	TATA	864	4	-	Common cis-acting
AlLAC17.1	TCA	TCATCTTCAT	324	9	+	Phytohromen
AlLAC17.1	TCA	TCATCTTCAT	905	9	+	Phytohromen
AlLAC17.1	Sp1	GGGCGG	732	6	-	Light responsiveness
AlLAC17.1	AT~TATA-box	TATATA	168	6	+	Common cis-acting
AlLAC17.1	AT~TATA-box	TATATA	862	6	-	Common cis-acting
AlLAC17.1	Unnamed__1	CGTGG	990	5	-	Unknown function
AlLAC17.1	MYB	CAACAG	119	6	-	TF-binding site
AlLAC17.1	MYC	CATGTG	246	6	+	TF-binding site
AlLAC17.1	MYC	CATGTG	390	6	+	TF-binding site
AlLAC17.1	MYC	CAATTG	424	6	+	TF-binding site
AlLAC17.1	MYC	CATTTG	481	6	+	TF-binding site
AlLAC17.1	Unnamed__4	CTCC	175	4	-	Unknown function
AlLAC17.1	Unnamed__4	CTCC	696	4	+	Unknown function
AlLAC17.1	Unnamed__4	CTCC	858	4	+	Unknown function
AlLAC17.1	Unnamed__4	CTCC	869	4	-	Unknown function
AlLAC17.1	Unnamed__4	CTCC	951	4	+	Unknown function
AlLAC17.1		motif_sequence	59	4	+	Unknown function
AlLAC17.1		motif_sequence	63	4	-	Unknown function
AlLAC17.1		motif_sequence	96	4	-	Unknown function
AlLAC17.1		motif_sequence	233	4	-	Unknown function
AlLAC17.1		motif_sequence	377	4	+	Unknown function
AlLAC17.1		motif_sequence	387	4	-	Unknown function
AlLAC17.1		motif_sequence	395	4	-	Unknown function
AlLAC17.1		motif_sequence	555	4	+	Unknown function
AlLAC17.1		motif_sequence	592	4	-	Unknown function
AlLAC17.1		motif_sequence	748	4	+	Unknown function
AlLAC17.1		motif_sequence	907	4	+	Unknown function
AlLAC17.1		motif_sequence	945	4	-	Unknown function
AlLAC17.1	AuxRR-core	GGTCCAT	273	7	+	Phytohromen
AlLAC17.1	ARE	AAACCA	987	6	+	Stress-related
AlLAC17.1	MRE	AACCTAA	37	7	+	TF-binding site
AlLAC17.1	TCT-motif	TCTTAC	255	6	+	Light responsiveness
AlLAC17.1	CGTCA-motif	CGTCA	328	5	+	Phytohromen
AlLAC17.1	Myb-binding site	CAACAG	119	6	-	TF-binding site
AlLAC17.1	ABRE	CGTACGTGCA	785	9	-	Phytohromen
AlLAC17.1	ABRE	ACGTG	787	5	-	Phytohromen
AlLAC17.1	Unnamed__16	GCTGCCCGTC	783	9	+	Unknown function
AlLAC17.1	as-1	TGACG	328	5	-	TF-binding site
AlLAC17.1	CAAT-box	CAAT	25	4	-	Common cis-acting
AlLAC17.1	CAAT-box	CCAAT	313	5	+	Common cis-acting
AlLAC17.1	CAAT-box	CAAT	314	4	+	Common cis-acting
AlLAC17.1	CAAT-box	CAAT	339	4	-	Common cis-acting
AlLAC17.1	CAAT-box	CAAT	424	4	+	Common cis-acting
AlLAC17.1	CAAT-box	CAAT	426	4	-	Common cis-acting
AlLAC17.1	CAAT-box	CAAT	472	4	+	Common cis-acting
AlLAC17.1	CAAT-box	CAAAT	482	5	-	Common cis-acting
AlLAC17.1	CAAT-box	CCAAT	493	5	-	Common cis-acting
AlLAC17.1	CAAT-box	CAAAT	609	5	+	Common cis-acting
AlLAC17.1	TGACG-motif	TGACG	328	5	-	Phytohromen
AlLAC17.2	Box 4	ATTAAT	460	6	+	Light responsiveness
AlLAC17.2	MYB	CAACAG	220	6	+	TF-binding site
AlLAC17.2	MYB	CAACCA	655	6	-	TF-binding site
AlLAC17.2	MYB	TAACCA	725	6	+	TF-binding site
AlLAC17.2	STRE	AGGGG	732	5	-	Stress-related
AlLAC17.2	TGA-element	AACGAC	137	6	-	Phytohromen
AlLAC17.2	Unnamed__1	CGTGG	77	5	-	Unknown function
AlLAC17.2	ABRE	ACGTG	415	5	+	Phytohromen
AlLAC17.2	ABRE	TACGGTC	571	7	+	Phytohromen
AlLAC17.2	W box	TTGACC	627	6	-	TF-binding site
AlLAC17.2	Myb-binding site	CAACAG	220	6	+	TF-binding site
AlLAC17.2	CCGTCC motif	CCGTCC	470	6	+	Unknown function
AlLAC17.2	TATA-box	TATA	552	4	-	Common cis-acting
AlLAC17.2	TATA-box	TACAAAA	564	7	+	Common cis-acting
AlLAC17.2	TATA-box	TATA	682	4	-	Common cis-acting
AlLAC17.2	TATA-box	TATATA	861	6	-	Common cis-acting
AlLAC17.2	TATA-box	ATATAT	862	6	-	Common cis-acting
AlLAC17.2	TATA-box	TATATA	863	6	-	Common cis-acting
AlLAC17.2	TATA-box	TATA	865	4	-	Common cis-acting
AlLAC17.2	G-box	CACGTC	414	6	-	Light responsiveness
AlLAC17.2	G-box	TAACACGTAG	584	9	-	Light responsiveness
AlLAC17.2	Unnamed__4	CTCC	38	4	+	Unknown function
AlLAC17.2	Unnamed__4	CTCC	132	4	+	Unknown function
AlLAC17.2	Unnamed__4	CTCC	154	4	+	Unknown function
AlLAC17.2	Unnamed__4	CTCC	196	4	-	Unknown function
AlLAC17.2	Unnamed__4	CTCC	226	4	+	Unknown function
AlLAC17.2	Unnamed__4	CTCC	538	4	+	Unknown function
AlLAC17.2	Unnamed__4	CTCC	790	4	+	Unknown function
AlLAC17.2	Unnamed__4	CTCC	837	4	+	Unknown function
AlLAC17.2	GTGGC-motif	CAGCGTGTGGC	667	10	-	Light responsiveness
AlLAC17.2		motif_sequence	36	4	+	Unknown function
AlLAC17.2		motif_sequence	215	4	+	Unknown function
AlLAC17.2		motif_sequence	445	4	-	Unknown function
AlLAC17.2		motif_sequence	493	4	+	Unknown function
AlLAC17.2		motif_sequence	775	4	+	Unknown function
AlLAC17.2		motif_sequence	800	4	-	Unknown function
AlLAC17.2		motif_sequence	848	4	+	Unknown function
AlLAC17.2		motif_sequence	938	4	-	Unknown function
AlLAC17.2	MYC	CATGTG	355	6	+	TF-binding site
AlLAC17.2	A-box	CCGTCC	470	6	+	Common cis-acting
AlLAC17.2	AT~TATA-box	TATATA	861	6	-	Common cis-acting
AlLAC17.2	AT~TATA-box	TATATA	863	6	-	Common cis-acting
AlLAC17.2	TCCC-motif	TCTCCCT	836	7	+	Light responsiveness
AlLAC17.2	as-1	TGACG	28	5	-	TF-binding site
AlLAC17.2	as-1	TGACG	957	5	-	TF-binding site
AlLAC17.2	CGTCA-motif	CGTCA	28	5	+	Phytohromen
AlLAC17.2	CGTCA-motif	CGTCA	957	5	+	Phytohromen
AlLAC17.2	CCGTCC-box	CCGTCC	470	6	+	Unknown function
AlLAC17.2	dOCT	CACGGATC	31	8	+	Tissue-specific
AlLAC17.2	TGACG-motif	TGACG	28	5	-	Phytohromen
AlLAC17.2	TGACG-motif	TGACG	957	5	-	Phytohromen
AlLAC17.2	CAAT-box	CCAAT	95	5	+	Common cis-acting
AlLAC17.2	CAAT-box	CAAT	96	4	+	Common cis-acting
AlLAC17.2	CAAT-box	CAAT	286	4	-	Common cis-acting
AlLAC17.2	CAAT-box	CAAT	464	4	-	Common cis-acting
AlLAC17.2	CAAT-box	CAAAT	519	5	-	Common cis-acting
AlLAC17.2	CAAT-box	CAAT	722	4	+	Common cis-acting
AlLAC17.2	CAAT-box	CCAAT	929	5	-	Common cis-acting
AlLAC17.2	TC-rich repeats	GTTTTCTTAC	325	9	-	Stress-related
AlLAC17.2	LTR	CCGAAA	557	6	-	Stress-related
AlLAC17.2	WRE3	CCACCT	318	6	-	Stress-related
AlLAC17.2	Myb	TAACTG	527	6	-	TF-binding site
AlLAC17.2	MYB-like sequence	TAACCA	725	6	+	TF-binding site
AlLAC11.1	MYB	CAACAG	75	6	+	TF-binding site
AlLAC11.1	MYC	CATTTG	625	6	-	TF-binding site
AlLAC11.1	STRE	AGGGG	771	5	-	Stress-related
AlLAC11.1	STRE	AGGGG	801	5	-	Stress-related
AlLAC11.1	Unnamed__1	CGTGG	898	5	-	Unknown function
AlLAC11.1	Unnamed_1	GGATTTTACAGT	598	11	+	Phytohromen
AlLAC11.1	ARE	AAACCA	713	6	-	Stress-related
AlLAC11.1	Unnamed__4	CTCC	340	4	-	Unknown function
AlLAC11.1	Unnamed__4	CTCC	350	4	-	Unknown function
AlLAC11.1	Unnamed__4	CTCC	846	4	-	Unknown function
AlLAC11.1	Unnamed__4	CTCC	858	4	+	Unknown function
AlLAC11.1	Unnamed__4	CTCC	927	4	+	Unknown function
AlLAC11.1	Unnamed__4	CTCC	930	4	+	Unknown function
AlLAC11.1	Unnamed__4	CTCC	989	4	-	Unknown function
AlLAC11.1		motif_sequence	39	4	-	Unknown function
AlLAC11.1		motif_sequence	249	4	+	Unknown function
AlLAC11.1		motif_sequence	350	4	-	Unknown function
AlLAC11.1		motif_sequence	856	4	+	Unknown function
AlLAC11.1		motif_sequence	925	4	+	Unknown function
AlLAC11.1		motif_sequence	939	4	+	Unknown function
AlLAC11.1	Box 4	ATTAAT	658	6	-	Light responsiveness
AlLAC11.1	TATA-box	TAAAGATT	8	8	-	Common cis-acting
AlLAC11.1	TATA-box	TACAAAA	35	7	-	Common cis-acting
AlLAC11.1	TATA-box	TATAAAT	161	7	-	Common cis-acting
AlLAC11.1	TATA-box	TATAAA	162	6	-	Common cis-acting
AlLAC11.1	TATA-box	TATAA	163	5	-	Common cis-acting
AlLAC11.1	TATA-box	TATA	164	4	+	Common cis-acting
AlLAC11.1	TATA-box	TATA	202	4	+	Common cis-acting
AlLAC11.1	TATA-box	TACAAAA	609	7	+	Common cis-acting
AlLAC11.1	TATA-box	ATATAA	615	6	+	Common cis-acting
AlLAC11.1	TATA-box	TATA	616	4	-	Common cis-acting
AlLAC11.1	TATA-box	TATA	702	4	-	Common cis-acting
AlLAC11.1	TATA-box	TATAAA	888	6	-	Common cis-acting
AlLAC11.1	TATA-box	TATAA	889	5	-	Common cis-acting
AlLAC11.1	TATA-box	TATA	890	4	-	Common cis-acting
AlLAC11.1	Myc	TCTCTTA	581	7	+	TF-binding site
AlLAC11.1	MYB recognition site	CCGTTG	691	6	+	TF-binding site
AlLAC11.1	CCAAT-box	CAACGG	691	6	-	TF-binding site
AlLAC11.1	MBS	CAACTG	876	6	+	Stress-related
AlLAC11.1	Myb	TAACTG	841	6	+	TF-binding site
AlLAC11.1	Myb	CAACTG	876	6	+	TF-binding site
AlLAC11.1	CAAT-box	CAAT	59	4	+	Common cis-acting
AlLAC11.1	CAAT-box	CAAT	85	4	+	Common cis-acting
AlLAC11.1	CAAT-box	CAAT	179	4	+	Common cis-acting
AlLAC11.1	CAAT-box	CAAAT	285	5	+	Common cis-acting
AlLAC11.1	CAAT-box	CAAAT	288	5	-	Common cis-acting
AlLAC11.1	CAAT-box	CAAAT	311	5	+	Common cis-acting
AlLAC11.1	CAAT-box	CAAAT	354	5	-	Common cis-acting
AlLAC11.1	CAAT-box	CAAT	372	4	-	Common cis-acting
AlLAC11.1	CAAT-box	CAAT	397	4	-	Common cis-acting
AlLAC11.1	CAAT-box	CAAAT	426	5	+	Common cis-acting
AlLAC11.1	CAAT-box	CAAAT	445	5	-	Common cis-acting
AlLAC11.1	CAAT-box	CAAAT	458	5	-	Common cis-acting
AlLAC11.1	CAAT-box	CAAT	482	4	-	Common cis-acting
AlLAC11.1	CAAT-box	CAAT	505	4	-	Common cis-acting
AlLAC11.1	CAAT-box	CAAAT	515	5	-	Common cis-acting
AlLAC11.1	CAAT-box	CAAAT	625	5	+	Common cis-acting
AlLAC11.1	CAAT-box	CAAAT	725	5	+	Common cis-acting
AlLAC11.1	CAAT-box	CAAAT	918	5	-	Common cis-acting
AlLAC11.1	GC-motif	CCCCCG	932	6	+	Stress-related
AlLAC11.1	CAT-box	GCCACT	436	6	+	Tissue-specific
AlLAC11.1	TCCC-motif	TCTCCCT	857	7	+	Light responsiveness
AlLAC11.1	Myb-binding site	CAACAG	75	6	+	TF-binding site
AlLAC12.1	ATC-motif	AGTAATCT	326	8	+	Light responsiveness
AlLAC12.1	Myb-binding site	CAACAG	582	6	+	TF-binding site
AlLAC12.1	Myb-binding site	CAACAG	652	6	+	TF-binding site
AlLAC12.1	GARE-motif	TCTGTTG	582	7	-	Phytohromen
AlLAC12.1	P-box	CCTTTTG	214	7	-	Phytohromen
AlLAC12.1	RY-element	CATGCATG	98	8	+	Tissue-specific
AlLAC12.1	Unnamed__2	CCCCGG	658	6	-	Unknown function
AlLAC12.1	MBS	CAACTG	203	6	+	Stress-related
AlLAC12.1	DRE core	GCCGAC	502	6	+	Stress-related
AlLAC12.1	Box 4	ATTAAT	536	6	-	Light responsiveness
AlLAC12.1	Unnamed__1	CGTGG	165	5	-	Unknown function
AlLAC12.1	MYB	CAACAG	582	6	+	TF-binding site
AlLAC12.1	MYB	CAACAG	652	6	+	TF-binding site
AlLAC12.1	MYB	CAACCA	810	6	+	TF-binding site
AlLAC12.1	MYB	CAACCA	819	6	+	TF-binding site
AlLAC12.1	STRE	AGGGG	443	5	-	Stress-related
AlLAC12.1	STRE	AGGGG	449	5	-	Stress-related
AlLAC12.1	MRE	AACCTAA	798	7	+	TF-binding site
AlLAC12.1	CAAT-box	CAAT	72	4	+	Common cis-acting
AlLAC12.1	CAAT-box	CAAT	193	4	-	Common cis-acting
AlLAC12.1	CAAT-box	CCAAT	238	5	+	Common cis-acting
AlLAC12.1	CAAT-box	CAAT	239	4	+	Common cis-acting
AlLAC12.1	CAAT-box	CAAT	277	4	-	Common cis-acting
AlLAC12.1	CAAT-box	CCAAT	308	5	-	Common cis-acting
AlLAC12.1	CAAT-box	CCAAT	459	5	+	Common cis-acting
AlLAC12.1	CAAT-box	CAAT	460	4	+	Common cis-acting
AlLAC12.1	CAAT-box	CAAT	916	4	-	Common cis-acting
AlLAC12.1	CAAT-box	TGCCAAC	918	7	+	Common cis-acting
AlLAC12.1	CAAT-box	CAAT	959	4	+	Common cis-acting
AlLAC12.1	LTR	CCGAAA	779	6	+	Stress-related
AlLAC12.1	Myb	TAACTG	55	6	+	TF-binding site
AlLAC12.1	Myb	CAACTG	203	6	+	TF-binding site
AlLAC12.1	Myb	TAACTG	223	6	+	TF-binding site
AlLAC12.1	G-box	CAGACGTGGCA	163	10	-	Light responsiveness
AlLAC12.1	G-box	CACGAC	479	6	+	Light responsiveness
AlLAC12.1	TATA-box	TATATA	882	6	-	Common cis-acting
AlLAC12.1	TATA-box	ATATAA	883	6	+	Common cis-acting
AlLAC12.1	TATA-box	TATA	884	4	-	Common cis-acting
AlLAC12.1	TCA	TCATCTTCAT	382	9	+	Phytohromen
AlLAC12.1	Unnamed__4	CTCC	219	4	-	Unknown function
AlLAC12.1	Unnamed__4	CTCC	236	4	+	Unknown function
AlLAC12.1	Unnamed__4	CTCC	411	4	+	Unknown function
AlLAC12.1	Unnamed__4	CTCC	456	4	+	Unknown function
AlLAC12.1	Unnamed__4	CTCC	464	4	+	Unknown function
AlLAC12.1	Unnamed__4	CTCC	499	4	-	Unknown function
AlLAC12.1	Unnamed__4	CTCC	728	4	-	Unknown function
AlLAC12.1	Unnamed__4	CTCC	839	4	-	Unknown function
AlLAC12.1		motif_sequence	74	4	+	Unknown function
AlLAC12.1		motif_sequence	88	4	-	Unknown function
AlLAC12.1		motif_sequence	234	4	+	Unknown function
AlLAC12.1		motif_sequence	322	4	-	Unknown function
AlLAC12.1		motif_sequence	330	4	+	Unknown function
AlLAC12.1		motif_sequence	346	4	+	Unknown function
AlLAC12.1		motif_sequence	370	4	+	Unknown function
AlLAC12.1		motif_sequence	372	4	-	Unknown function
AlLAC12.1		motif_sequence	378	4	+	Unknown function
AlLAC12.1		motif_sequence	409	4	+	Unknown function
AlLAC12.1		motif_sequence	429	4	+	Unknown function
AlLAC12.1		motif_sequence	462	4	+	Unknown function
AlLAC12.1		motif_sequence	542	4	+	Unknown function
AlLAC12.1		motif_sequence	603	4	-	Unknown function
AlLAC12.1		motif_sequence	616	4	-	Unknown function
AlLAC12.1		motif_sequence	687	4	+	Unknown function
AlLAC12.1	ARE	AAACCA	15	6	+	Stress-related
AlLAC12.1	ARE	AAACCA	172	6	-	Stress-related
AlLAC12.1	ARE	AAACCA	682	6	+	Stress-related
AlLAC12.1	AT~TATA-box	TATATA	882	6	-	Common cis-acting
AlLAC12.1	MYC	CATGTG	96	6	-	TF-binding site
AlLAC15	G-box	CACGAC	174	6	-	Light responsiveness
AlLAC15	G-box	CACGTC	817	6	+	Light responsiveness
AlLAC15	MYB recognition site	CCGTTG	374	6	+	TF-binding site
AlLAC15	TATA-box	TATACA	417	6	-	Common cis-acting
AlLAC15	TATA-box	TATA	419	4	+	Common cis-acting
AlLAC15	TATA-box	TATAA	682	5	-	Common cis-acting
AlLAC15	TATA-box	TATA	683	4	-	Common cis-acting
AlLAC15	TATA-box	taTATAAAtc	922	9	+	Common cis-acting
AlLAC15	TATA-box	TATA	943	4	-	Common cis-acting
AlLAC15	O2-site	GATGACATGG	49	9	+	Growth and development
AlLAC15	Sp1	GGGCGG	24	6	-	Light responsiveness
AlLAC15	A-box	CCGTCC	308	6	+	Common cis-acting
AlLAC15	MYC	CATGTG	463	6	+	TF-binding site
AlLAC15	MYC	CATTTG	593	6	+	TF-binding site
AlLAC15	MYC	CATGTG	599	6	+	TF-binding site
AlLAC15	Unnamed__4	CTCC	108	4	+	Unknown function
AlLAC15	Unnamed__4	CTCC	120	4	-	Unknown function
AlLAC15	Unnamed__4	CTCC	171	4	-	Unknown function
AlLAC15	Unnamed__4	CTCC	240	4	+	Unknown function
AlLAC15	Unnamed__4	CTCC	267	4	-	Unknown function
AlLAC15	Unnamed__4	CTCC	296	4	-	Unknown function
AlLAC15	Unnamed__4	CTCC	372	4	+	Unknown function
AlLAC15	Unnamed__4	CTCC	433	4	-	Unknown function
AlLAC15	Unnamed__4	CTCC	706	4	+	Unknown function
AlLAC15	Unnamed__4	CTCC	822	4	+	Unknown function
AlLAC15	Unnamed__4	CTCC	854	4	+	Unknown function
AlLAC15	Unnamed__4	CTCC	857	4	+	Unknown function
AlLAC15	Unnamed__4	CTCC	908	4	+	Unknown function
AlLAC15	Unnamed__4	CTCC	932	4	-	Unknown function
AlLAC15	Unnamed__4	CTCC	956	4	+	Unknown function
AlLAC15		motif_sequence	81	4	+	Unknown function
AlLAC15		motif_sequence	96	4	-	Unknown function
AlLAC15		motif_sequence	106	4	+	Unknown function
AlLAC15		motif_sequence	198	4	-	Unknown function
AlLAC15		motif_sequence	296	4	-	Unknown function
AlLAC15		motif_sequence	322	4	+	Unknown function
AlLAC15		motif_sequence	353	4	+	Unknown function
AlLAC15		motif_sequence	483	4	+	Unknown function
AlLAC15		motif_sequence	554	4	+	Unknown function
AlLAC15		motif_sequence	556	4	-	Unknown function
AlLAC15	CCGTCC-box	CCGTCC	308	6	+	Unknown function
AlLAC15	CGTCA-motif	CGTCA	314	5	-	Phytohromen
AlLAC15	CGTCA-motif	CGTCA	964	5	+	Phytohromen
AlLAC15	as-1	TGACG	314	5	+	TF-binding site
AlLAC15	as-1	TGACG	964	5	-	TF-binding site
AlLAC15	WRE3	CCACCT	144	6	+	Stress-related
AlLAC15	CAAT-box	CCAAT	128	5	+	Common cis-acting
AlLAC15	CAAT-box	CAAT	129	4	+	Common cis-acting
AlLAC15	CAAT-box	CAAAT	594	5	-	Common cis-acting
AlLAC15	CAAT-box	CAAAT	700	5	-	Common cis-acting
AlLAC15	CAAT-box	CAAT	842	4	-	Common cis-acting
AlLAC15	CAAT-box	CCAAT	910	5	+	Common cis-acting
AlLAC15	CAAT-box	CAAT	911	4	+	Common cis-acting
AlLAC15	TGACG-motif	TGACG	314	5	+	Phytohromen
AlLAC15	TGACG-motif	TGACG	964	5	-	Phytohromen
AlLAC15	CCAAT-box	CAACGG	374	6	-	TF-binding site
AlLAC15	Unnamed__1	CGTGG	154	5	+	Unknown function
AlLAC15	MYB	CAACCA	156	6	-	TF-binding site
AlLAC15	GATA-motif	GATAGGA	486	7	-	Light responsiveness
AlLAC15	GATA-motif	GATAGGG	799	7	-	Light responsiveness
AlLAC15	STRE	AGGGG	551	5	-	Stress-related
AlLAC15	STRE	AGGGG	733	5	-	Stress-related
AlLAC15	STRE	AGGGG	798	5	-	Stress-related
AlLAC15	ABRE	ACGTG	817	5	-	Phytohromen
AlLAC15	W box	TTGACC	496	6	+	TF-binding site
AlLAC15	circadian	CAAAGATATC	916	10	+	Growth and development
AlLAC15	CCGTCC motif	CCGTCC	308	6	+	Unknown function
